# Supplementary material
Source: PubMed Central journal article supplement (PMC3249375)
Supplement: supp_111.132779_132779SI.pdf [file supp_111.132779_132779SI.pdf]

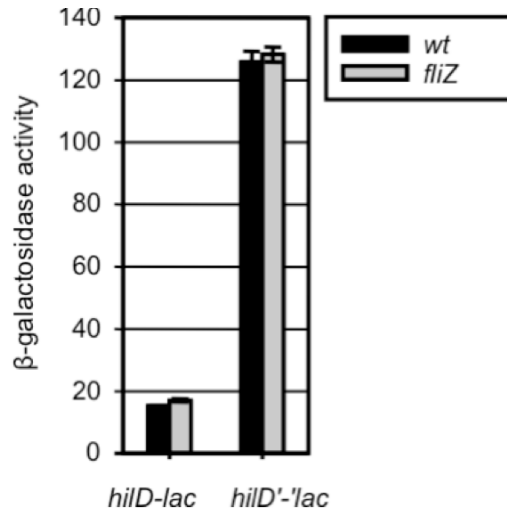

**Figure S1** Class I, FlizZ has no effect on HilD transcription or translation. For the equivalent of panels A and B (for example in Fig. S2) see FIGURE 3 in our previous publication (Chubiz et al., 2010). The panel above (equivalent to panel C in FIGURE S2) shows the  $\beta$ -galactosidase activity in strains containing a *hilD-lac* transcriptional or a *hilD'-lac* translational fusion and the indicated mutations after growth under SPI1 inducing conditions.  $\beta$ -galactosidase activity units are defined as ( $\mu\text{mol of ONP formed min}^{-1}$ )  $\times 10^3 / (\text{OD}_{600} \times \text{ml of cell suspension})$  and are reported as mean  $\pm$  standard deviation where  $n=4$ .

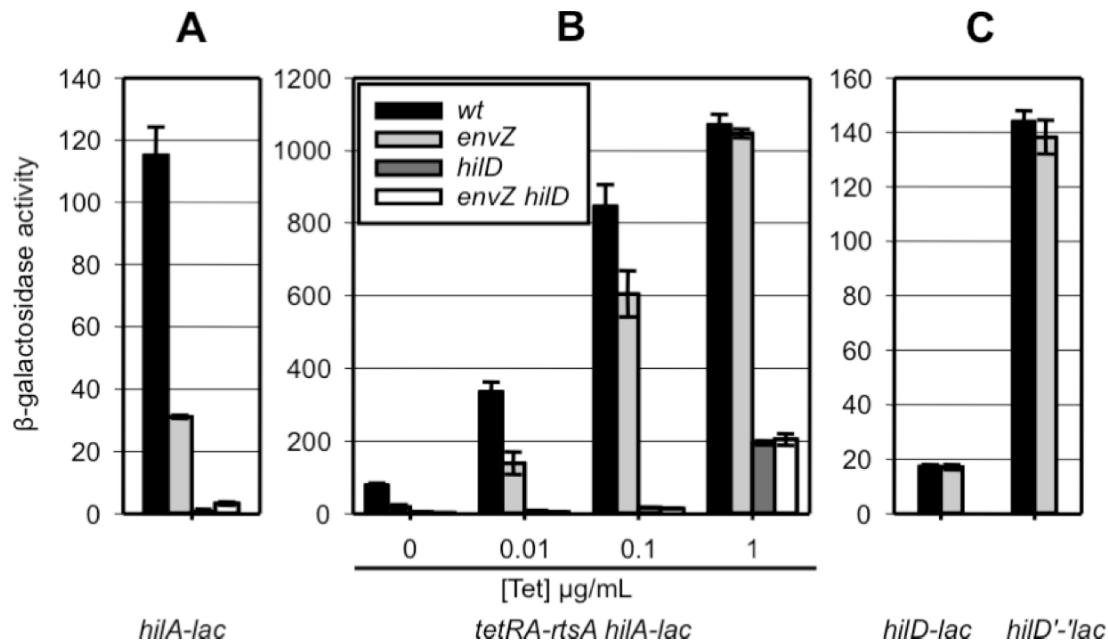

**Figure S2** Class I, EnvZ activates *hilA* expression via post-translational control of HilD. (A)  $\beta$ -galactosidase activity in strains containing a *hilA-lac* transcriptional fusion and the indicated mutations after growth under SPI1 inducing conditions. (B)  $\beta$ -galactosidase activity of strains containing a *hilA-lac* transcriptional fusion and indicated mutations with *rtsA* under the control of a tetracycline regulated promoter. Strains were grown under SPI1-inducing conditions with the indicated tetracycline concentrations. (C)  $\beta$ -galactosidase activity in strains containing a *hilD-lac* transcriptional or a *hilD'-lac* translational fusion and the indicated mutations after growth under SPI1 inducing conditions.  $\beta$ -galactosidase activity units are defined as  $(\mu\text{mol of ONP formed min}^{-1}) \times 10^3 / (\text{OD}_{600} \times \text{ml of cell suspension})$  and are reported as mean  $\pm$  standard deviation where  $n=4$ .

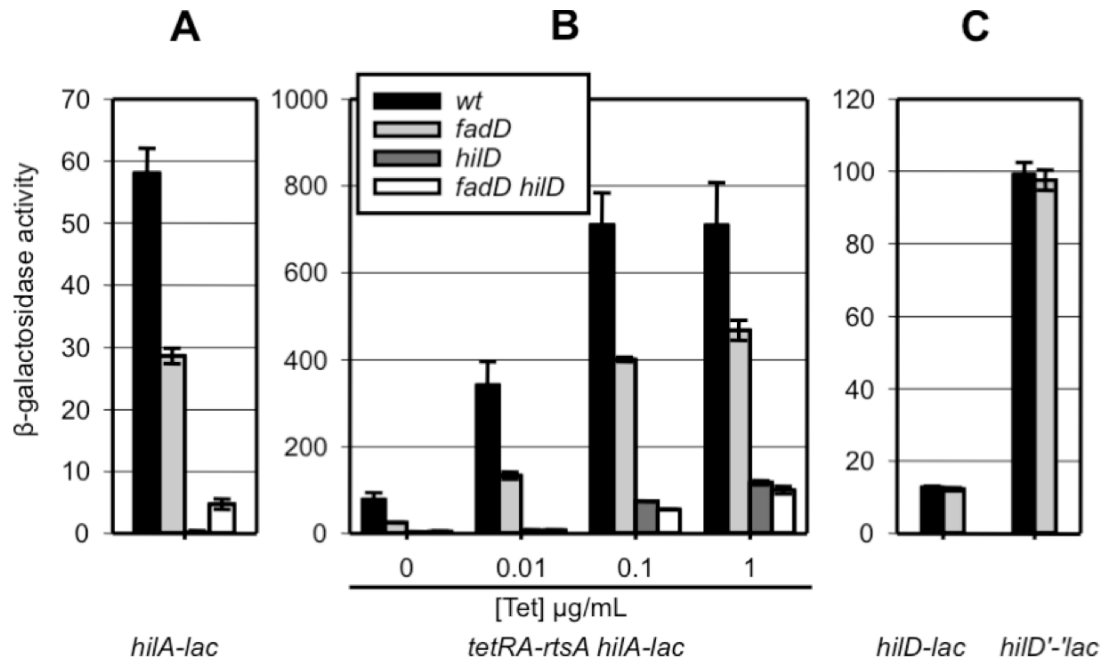

**Figure S3** Class I, FadD activates *hilA* expression via the post-translational control of HiID. See FIGURE S2 legend for details.

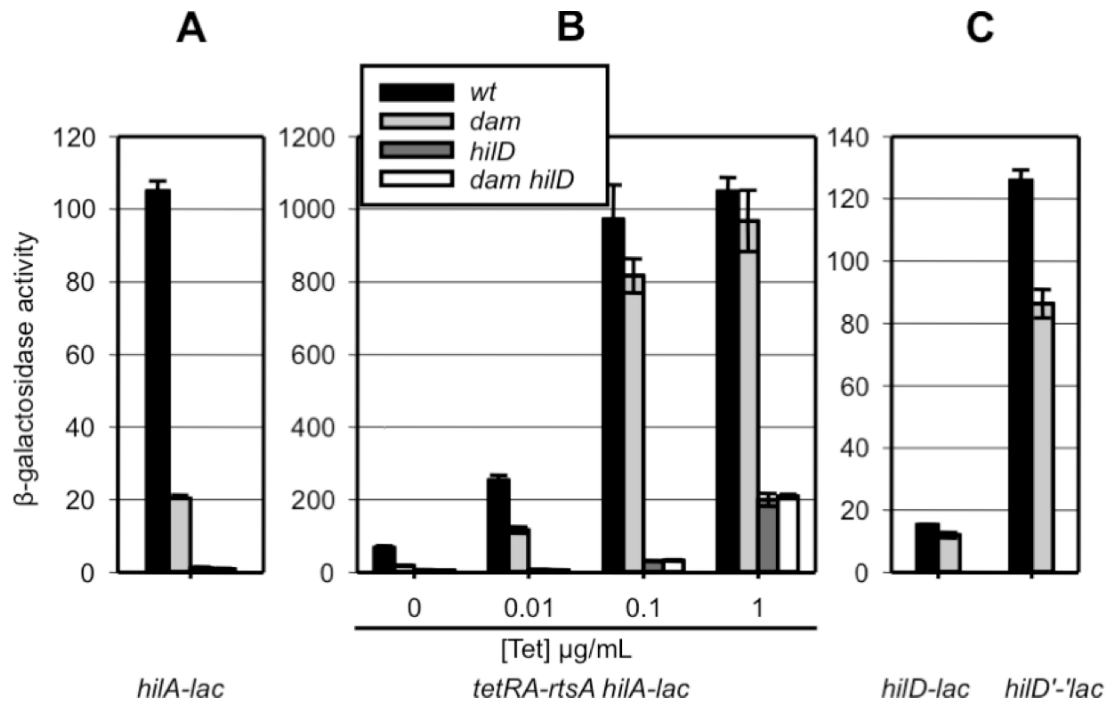

**Figure S4** Class II, Dam activates *hilA* expression via the post-transcriptional control of *hilD*. See FIGURE S2 legend for details.

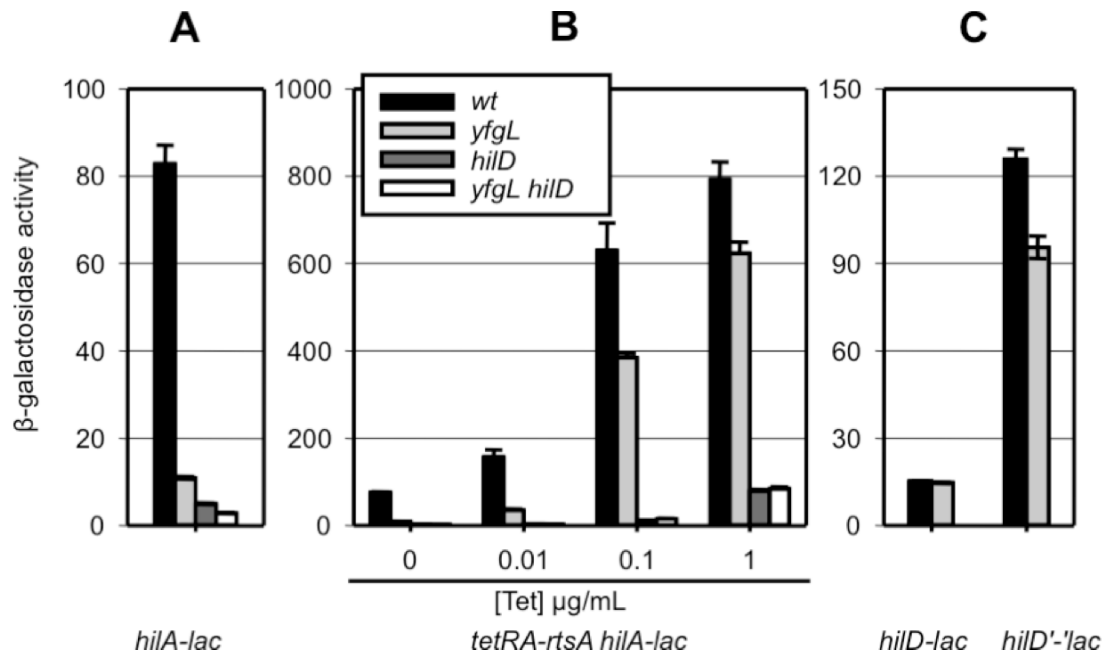

**Figure S5** Class II, YfgL activates *hiA* expression via the post-transcriptional control of *hiD*. See FIGURE S2 legend for details.

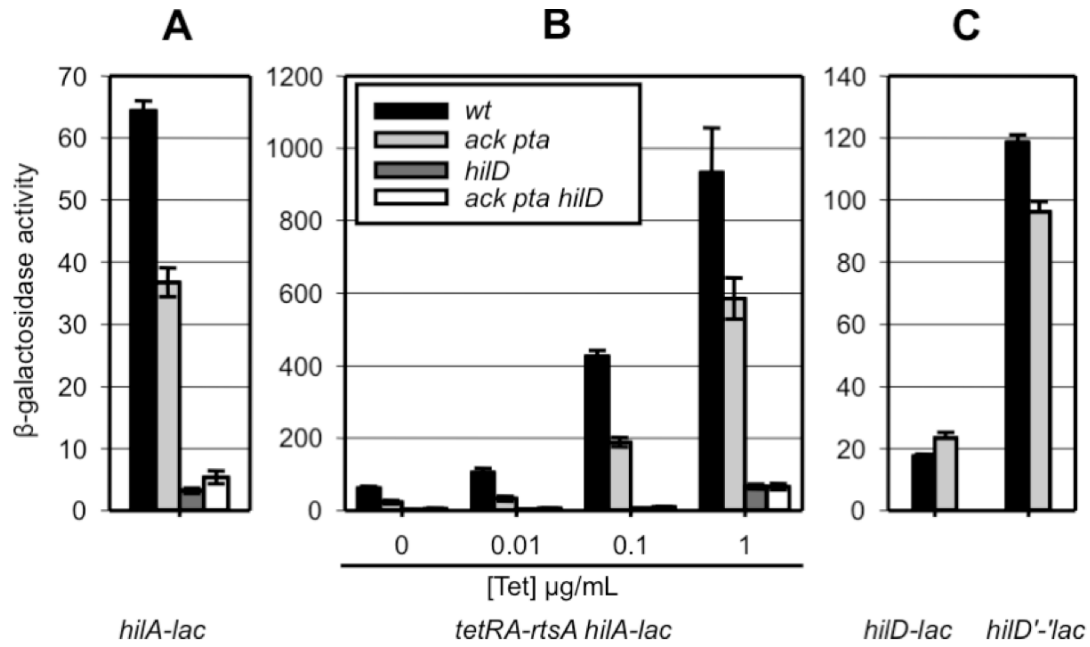

**Figure S6** Class II, Ack Pta activates *hilA* expression via the post-transcriptional control of *hilD*. See FIGURE S2 legend for details.

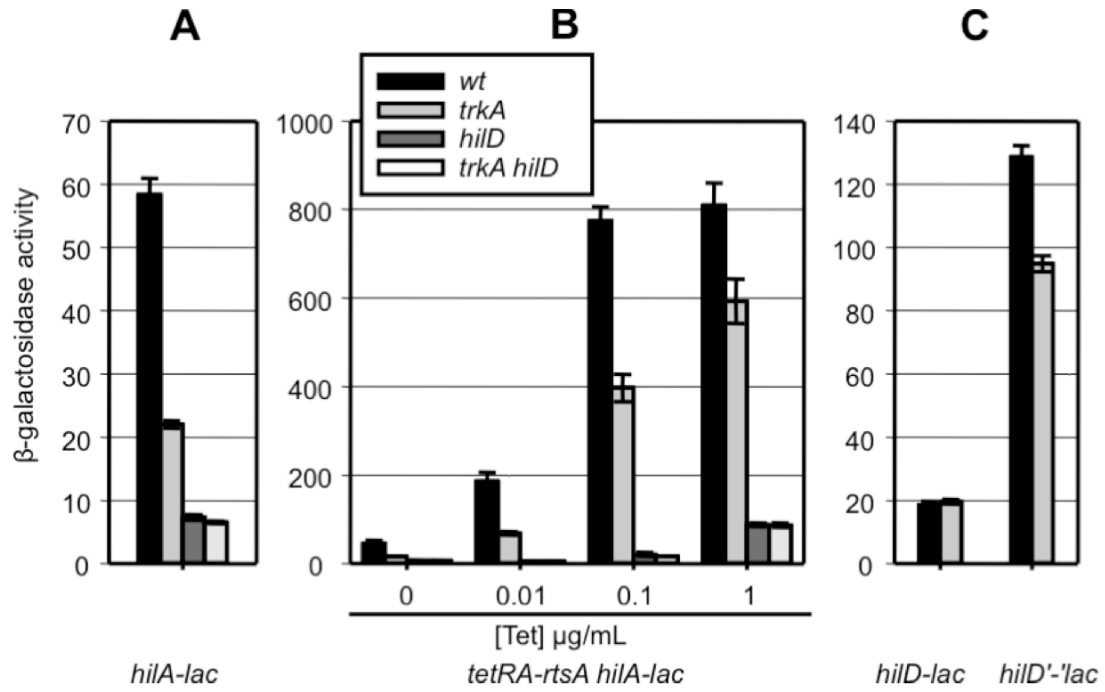

**Figure S7** Class II, TrkA activates *hilA* expression via the post-transcriptional control of *hilD*. See FIGURE S2 legend for details.

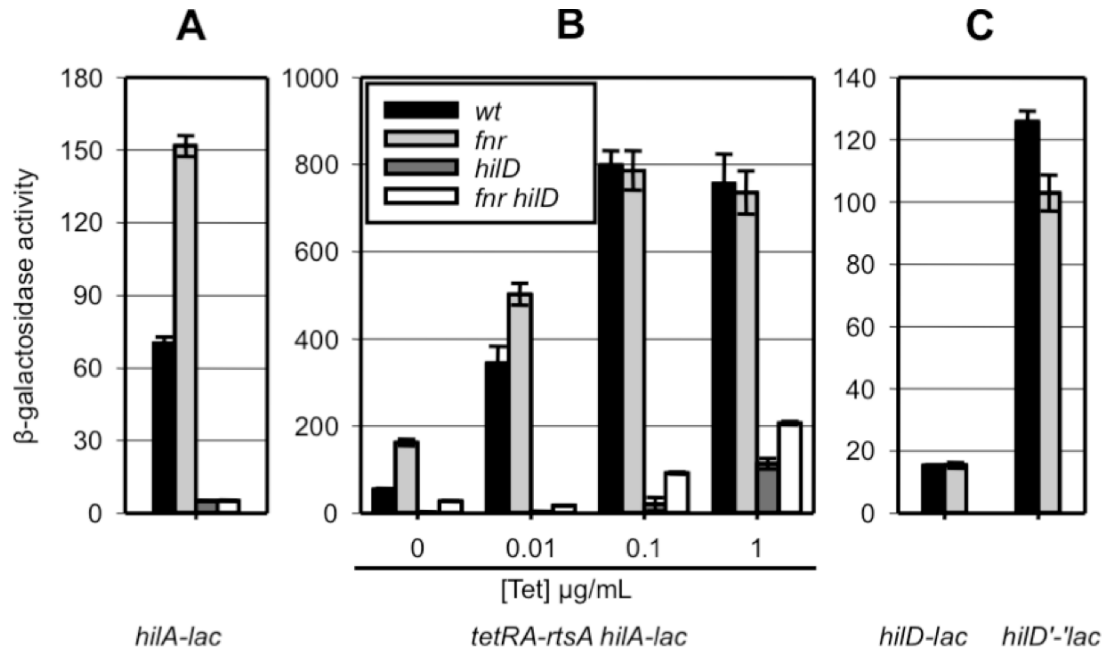

**Figure S8** Class III, Fnr represses *hilA* expression independently of HilD. See FIGURE S2 legend for details.



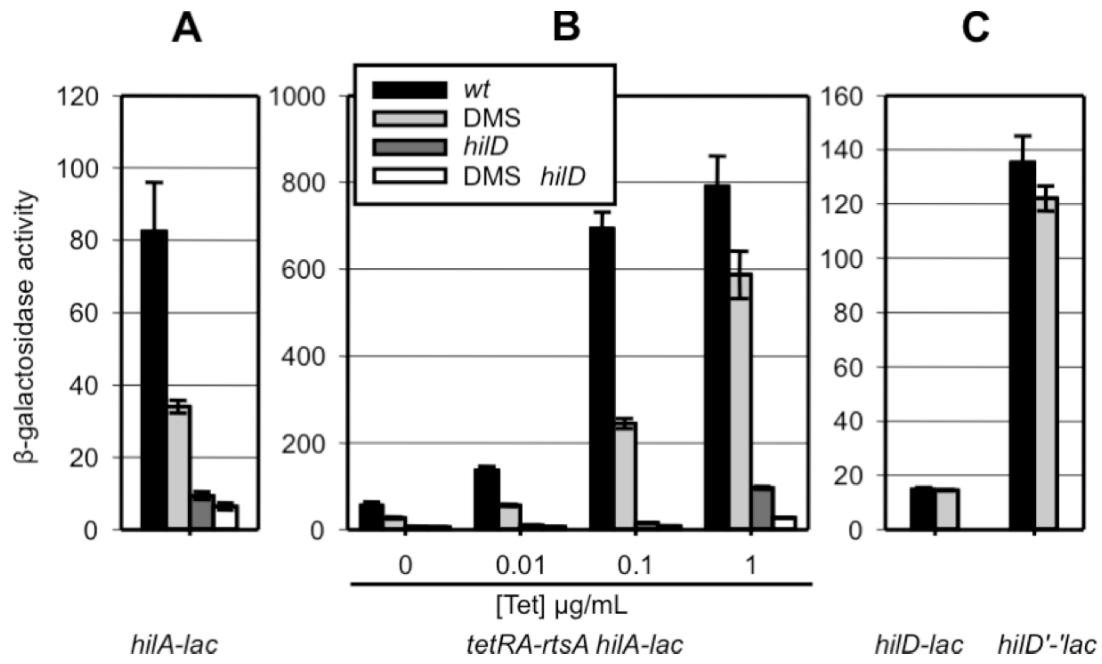

**Figure S9** Class III, Dimethyl sulfide (DMS) represses *hilA* expression independently of HilD. See FIGURE S2 legend for details.

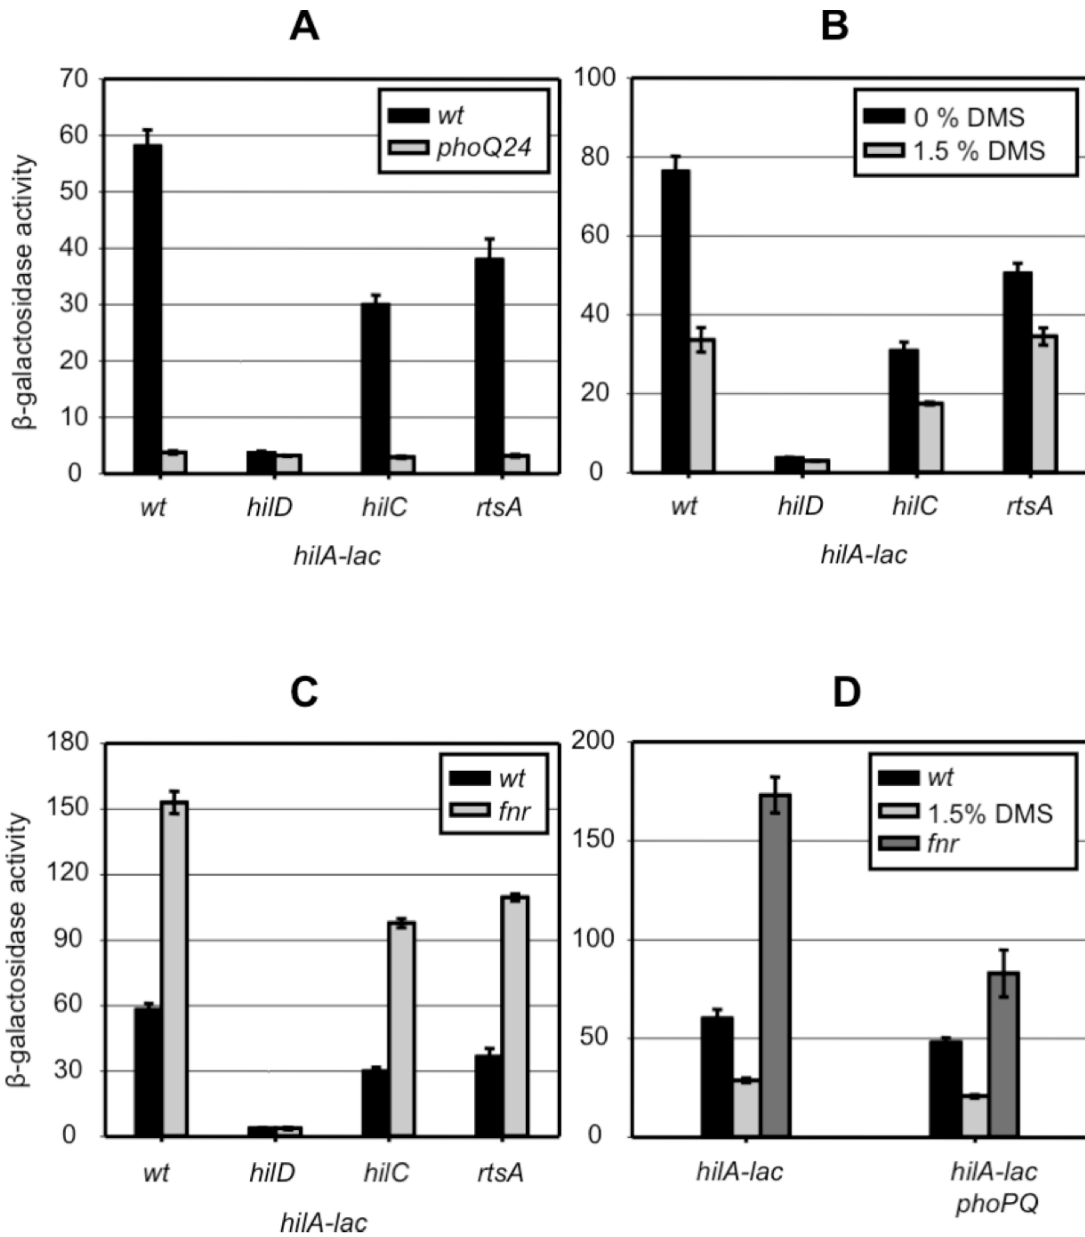

**Figure S10** A) PhoPQ, (B) dimethyl sulfide (DMS), and (C) Fnr repress *hilA* expression independently of HilC and RtsA. (D) Dimethyl sulfide (DMS) and Fnr repress *hilA* expression independently of PhoPQ.  $\beta$ -galactosidase activity in strains containing a *hilA-lac* transcriptional fusion and the indicated mutations, or in the presence or absence of the 1.5% dimethyl sulfide, after growth under SPI1 inducing conditions.  $\beta$ -galactosidase activity units are defined as  $(\mu\text{mol of ONP formed min}^{-1}) \times 10^3 / (\text{OD600} \times \text{ml of cell suspension})$  and are reported as mean  $\pm$  standard deviation where  $n=4$ .

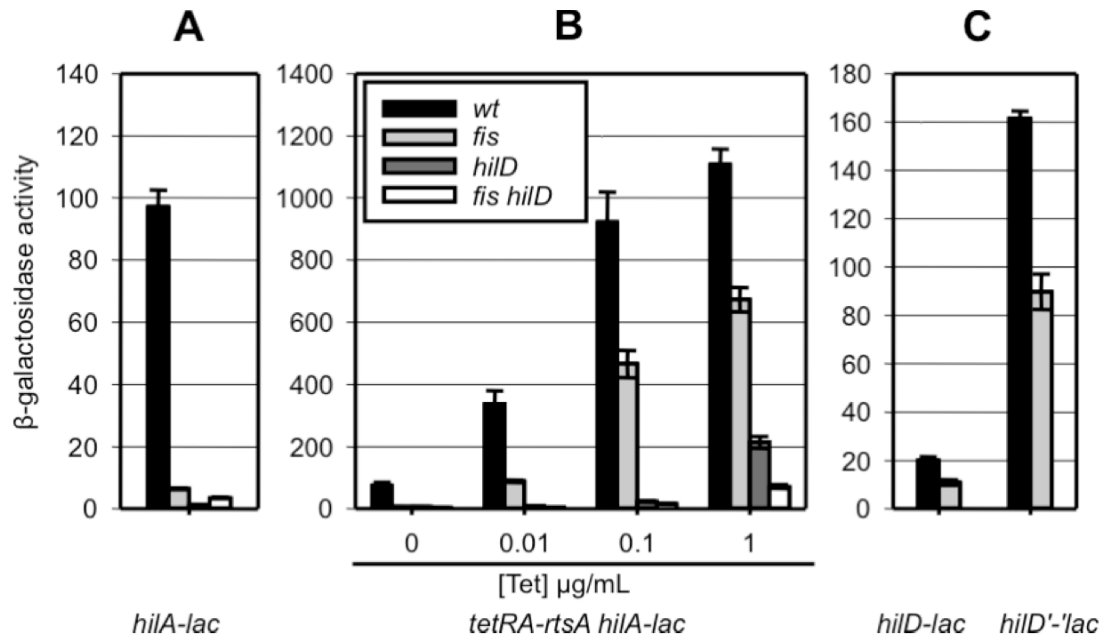

**Figure S11** Class IV, Fis activates SPI 1 expression independently of HlID (affect all promoters in the feed-forward loop). See FIGURE S2 legend for details.

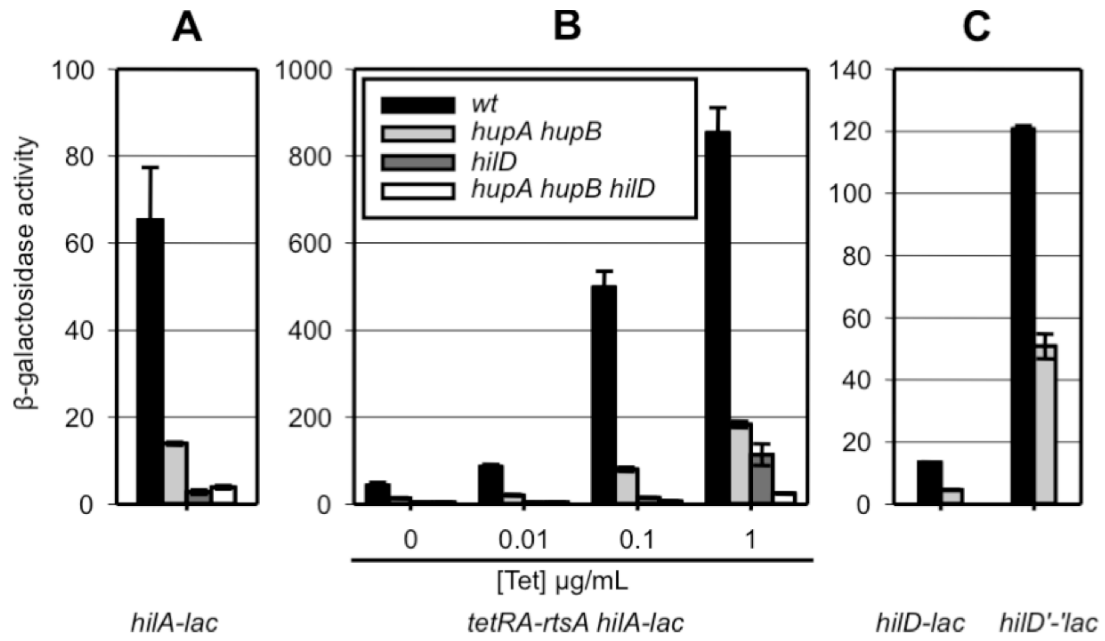

**Figure S12** Class IV, HU (encoded by *hupA hupB*) activates SPI 1 expression independently of HIL D (affect all promoters in the feed-forward loop). See FIGURE S2 legend for details.

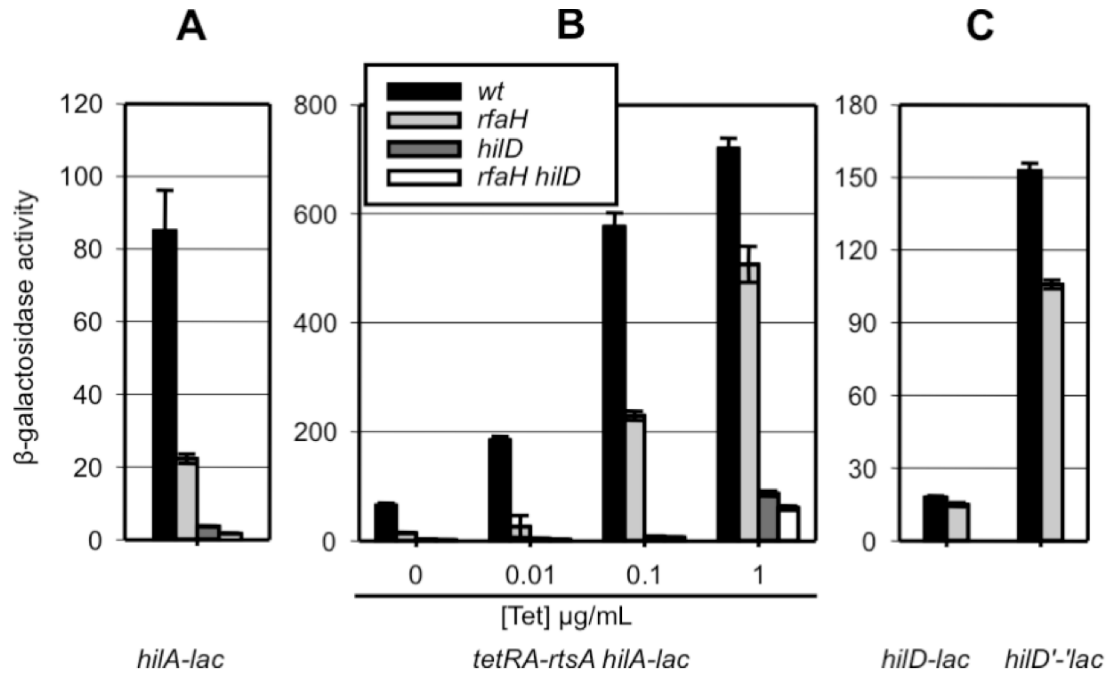

**Figure S13** Class IV, RfaH activates SPI 1 expression independently of HilD (affect all promoters in the feed-forward loop). See FIGURE S2 legend for details.

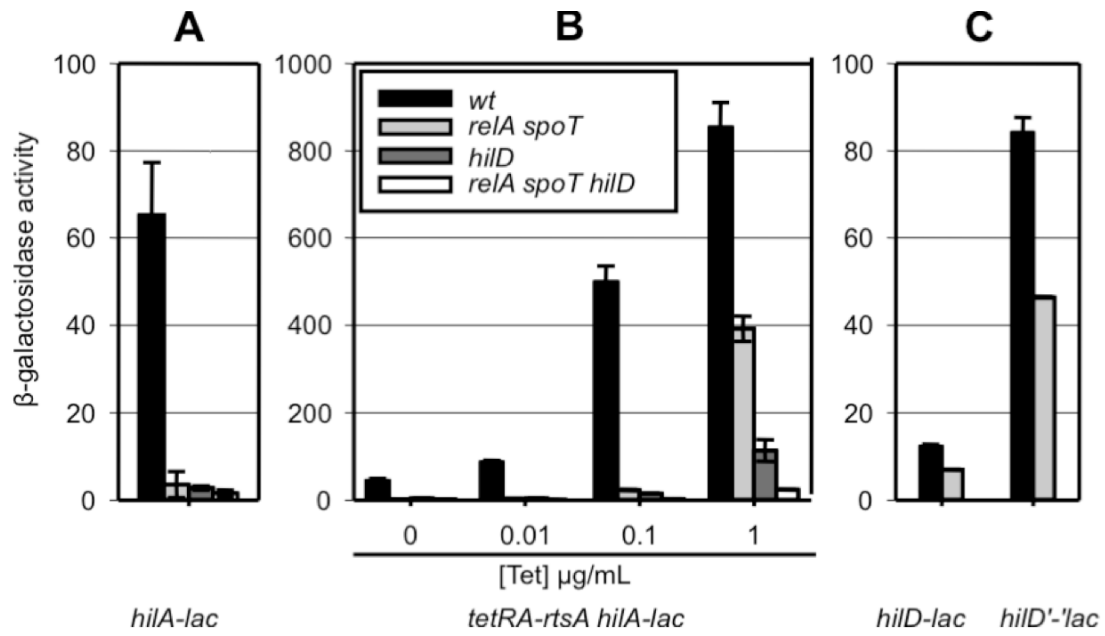

**Figure S14** Class IV, ppGpp (produced by RelA and SpoT) activates SPI 1 expression independently of HilD (affect all promoters in the feed-forward loop). See FIGURE S2 legend for details.

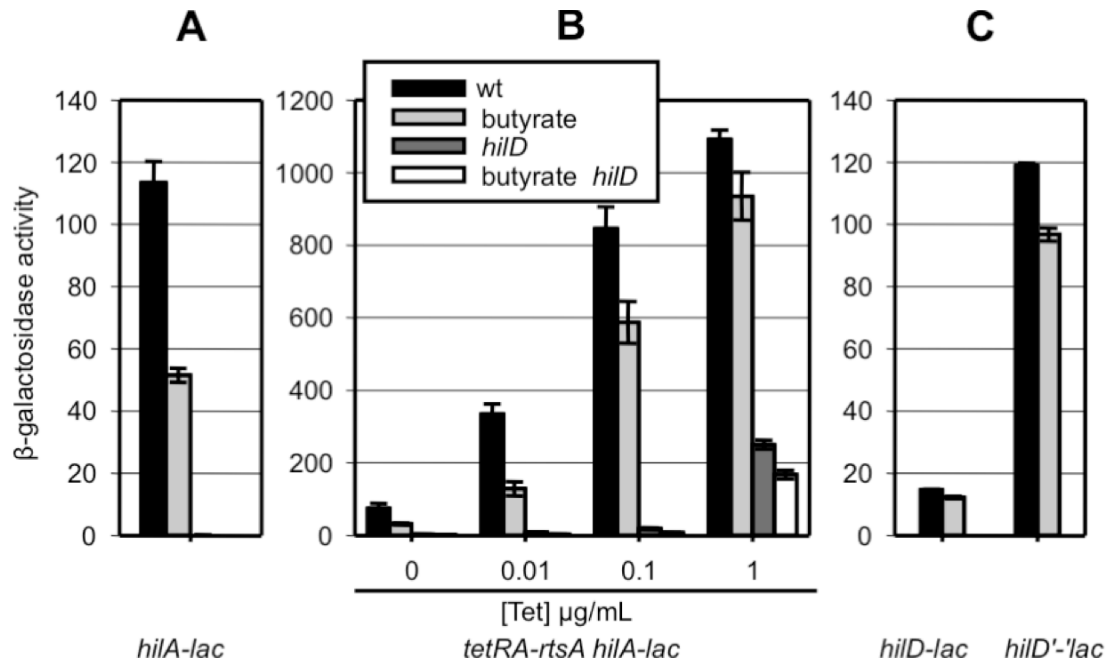

**Figure S15** Class IV, Butyrate represses SPI1 expression independently of HiID (affect all promoters in the feed-forward loop). See FIGURE S2 legend for details.

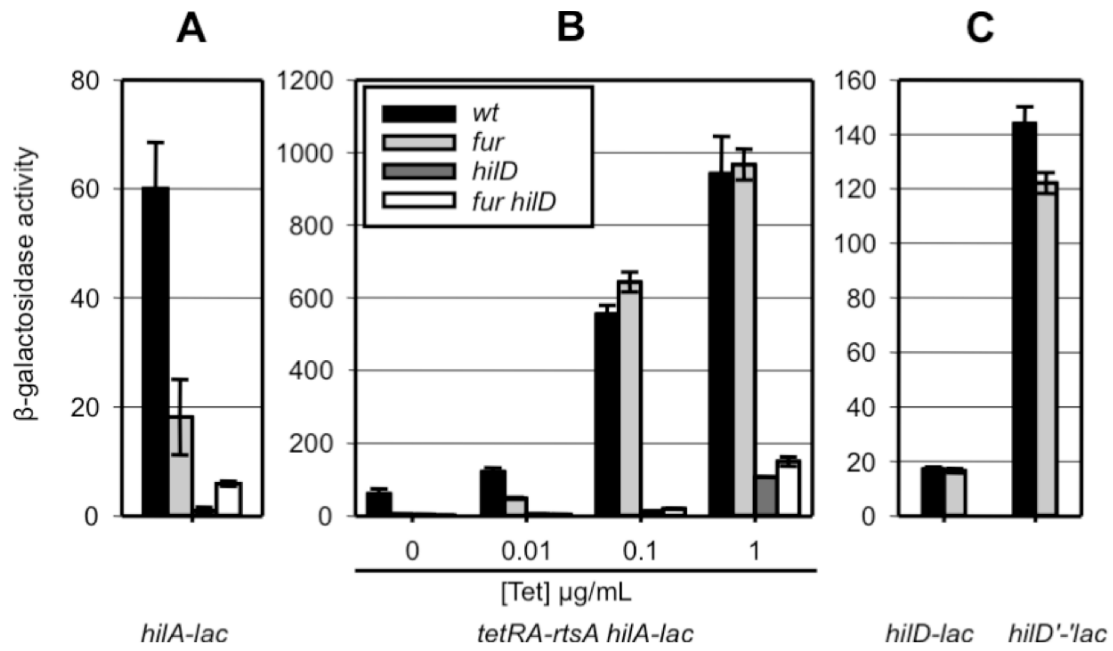

**Figure S16** Class V, Fur activates *hilA* expression via HilD. See FIGURE S2 legend for details.



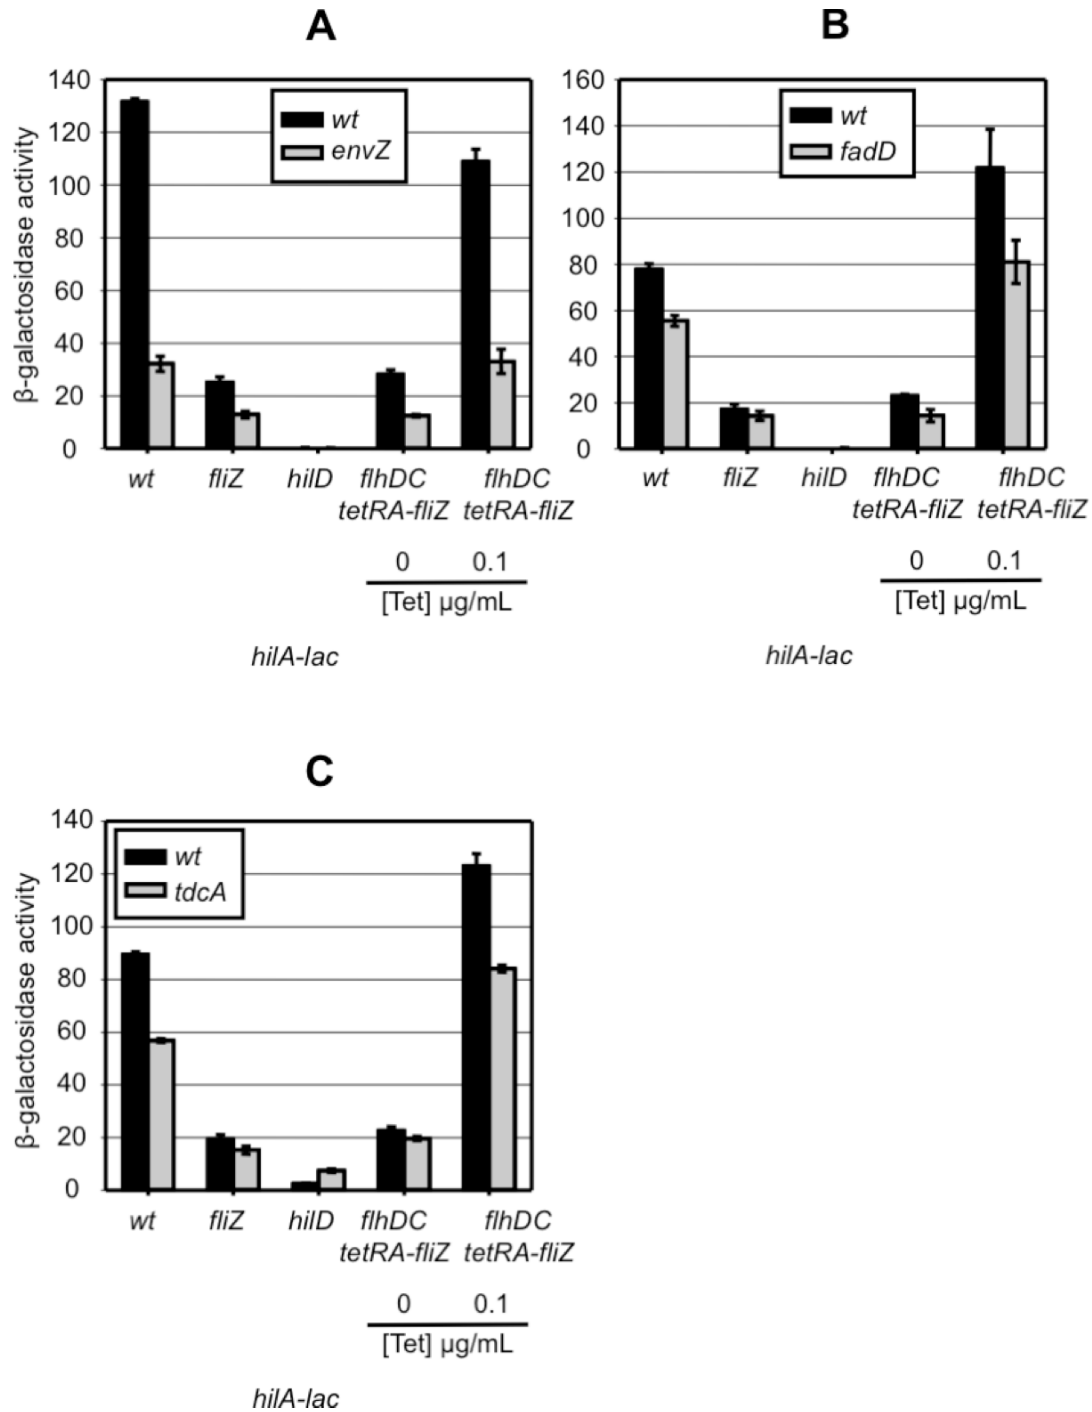

**Figure S17** A) EnvZ, (B) FadD, and (C) TdcA affect *hilA* expression independently of *FliZ*.  $\beta$ -galactosidase activity in strains containing a *hilA-lac* transcriptional fusion and the indicated mutations after growth under SPI1 inducing conditions.  $\beta$ -galactosidase activity units are defined as  $(\mu\text{mol of ONP formed min}^{-1}) \times 10^3 / (\text{OD600} \times \text{ml of cell suspension})$  and are reported as mean  $\pm$  standard deviation where  $n=4$ .

**TABLE S1 Regulatory factors/conditions affecting expression of SPI1**

| <b>Regulator</b> | <b>Description</b>                                                                                                                                     | <b>Mechanism of action/comments</b>                                                                  | <b>References</b>                                         |
|------------------|--------------------------------------------------------------------------------------------------------------------------------------------------------|------------------------------------------------------------------------------------------------------|-----------------------------------------------------------|
| HilA             | Transcriptional activator, OmpR/ToxR family                                                                                                            | Direct activation of <i>prg/org</i> and <i>inv/spa</i> operons                                       | (8; 23; 27; 56; 57)                                       |
| HilD             | AraC-like transcriptional activator                                                                                                                    | Direct activation of <i>hilA</i> , <i>hilD</i> , <i>hilC</i> , and <i>rtsA</i>                       | (29; 88)                                                  |
| HilC             | AraC-like transcriptional activator                                                                                                                    | Direct activation of <i>hilA</i> , <i>hilD</i> , <i>hilC</i> , and <i>rtsA</i>                       | (28; 29; 46; 88)                                          |
| RtsA             | AraC-like transcriptional activator                                                                                                                    | Direct activation of <i>hilA</i> , <i>hilD</i> , <i>hilC</i> , and <i>rtsA</i>                       | (29; 30)                                                  |
| HilE             |                                                                                                                                                        | Repression of <i>hilA</i> by binding to and preventing HilD function                                 | (11); Chubiz JE (unpublished)                             |
| FlhZ             | Enhancer of class II flagellar genes expression                                                                                                        | Activation of <i>hilA</i> via post-translational regulation of HilD                                  | (20; 45; 54; 59; 85; 102)                                 |
| EnvZ/OmpR        | Two-component regulatory system; regulation of outer membrane porin genes, and virulence                                                               | Activation of <i>hilA</i> via HilD                                                                   | (29; 58)                                                  |
| FadD             | Acyl-CoA synthetase; degradation of long-chain fatty acids                                                                                             | Activation of <i>hilA</i> via an unknown mechanism                                                   | (59); Ellermeier JR (unpublished)                         |
| SirA             | Transcriptional regulator; two-component regulatory system BarA/SirA; regulation of carbohydrate metabolism, motility, biofilm formation, and invasion | Activation of <i>hilA</i> via activation of <i>csrB/csrC</i> to block CsrA repression of <i>hilD</i> | (1; 29; 46; 52; 62; 99; 102); Ellermeier JR (unpublished) |
| Dam              | DNA methylase                                                                                                                                          | Activation of <i>hilA</i> via post-transcriptional regulation of <i>hilD</i>                         | (55)                                                      |
| Ack Pta          | acetate kinase and phosphotransacetylase                                                                                                               | Activation of <i>hilA</i> and <i>hilD</i> by formate via an unknown mechanism                        | (43)                                                      |

**TABLE S1 Regulatory factors/conditions affecting expression of SPI1**

| <b>Regulator</b> | <b>Description</b>                                                                                                       | <b>Mechanism of action/comments</b>                                                                                            | <b>References</b>                                 |
|------------------|--------------------------------------------------------------------------------------------------------------------------|--------------------------------------------------------------------------------------------------------------------------------|---------------------------------------------------|
| YfgL             | Outer membrane lipoprotein; assembly of the outer membrane $\beta$ -barrel proteins in complex with YaeT, YfiO, and NlpB | Activation of SPI1 genes via an unknown mechanism                                                                              | (2; 37)                                           |
| Trk (potassium)  | Potassium transporter                                                                                                    | Activation of SPI1 genes via an unknown mechanism                                                                              | (94)                                              |
| Fnr              | Transcriptional regulator; cytoplasmic oxygen sensor                                                                     | Repression of <i>hilA</i> via an unknown mechanism                                                                             | (102); Ellermeier JR (unpublished)                |
| PhoPQ (PhoQ24)   | Two-component regulatory system; response to divalent cation limitation, pH and antimicrobial peptides                   | Repression of <i>hilA</i> , most likely direct                                                                                 | (9; 10; 14; 78; 111); Ellermeier JR (unpublished) |
| H-NS             | Nucleoid protein                                                                                                         | Direct repression of <i>hilA</i> , <i>hilC</i> , <i>hilD</i> and <i>rtsA</i>                                                   | (73; 74; 89)                                      |
| Hha              | Nucleoid protein                                                                                                         | Direct repression of <i>hilA</i> , <i>hilC</i> , <i>hilD</i> and <i>rtsA</i>                                                   | (36; 73; 74; 102)                                 |
| Fis              | Nucleoid protein                                                                                                         | Activation of SPI1 genes                                                                                                       | (22; 48; 89; 110)}                                |
| HU               | Nucleoid protein                                                                                                         | Activation of SPI1 genes                                                                                                       | (60; 89)                                          |
| RfaH             | Transcriptional anti-terminator; long operons for LPS core and O-antigen biosynthesis                                    | Activation of SPI1 genes via an unknown mechanism                                                                              | (60; 67)                                          |
| Fur              | Transcriptional regulator; response to iron                                                                              | Activation of <i>hilA</i> via an unknown regulation of HilD; repression of H-NS; direct binding of Fur to <i>hilD</i> promoter | (32; 98; 101)                                     |
| TdcA             | Transcriptional regulator of <i>tdc</i> operon; transport and metabolism of L-                                           | Activation of <i>fliZ</i> and SPI1 genes expression                                                                            | (50)                                              |

**TABLE S1 Regulatory factors/conditions affecting expression of SPI1**

| Regulator              | Description                                                                                                                                                                | Mechanism of action/comments                                                                                 | References                                    |
|------------------------|----------------------------------------------------------------------------------------------------------------------------------------------------------------------------|--------------------------------------------------------------------------------------------------------------|-----------------------------------------------|
|                        | threonine and L-serine                                                                                                                                                     |                                                                                                              |                                               |
| FhDC                   | Transcriptional regulator; activation of class II flagellar genes                                                                                                          | Activation of <i>hilA</i> via activation of <i>fliZ</i>                                                      | (20; 54)                                      |
| DsbA                   | Periplasmic disulfide bond oxidase                                                                                                                                         | Activation of <i>hilA</i> via activation of <i>FliZ</i> , including repression of <i>RcsCDB</i>              | (31; 54)                                      |
| RcsCDB                 | phosphorelay system: sensor <i>RcsC</i> , response regulator <i>RcsB</i> , and phosphotransfer protein <i>RcsD</i> ; regulation of capsule synthesis and biofilm formation | Repression of <i>hilA</i> via repression of <i>FliZ</i> and an independent unknown regulation of <i>HilD</i> | (54)                                          |
| Lon                    | ATP-dependent protease                                                                                                                                                     | Repression of <i>hilA</i> via degradation of <i>HilD</i> , <i>HilC</i> , and <i>FliZ</i>                     | (16; 20; 95; 97)                              |
| ClpXP                  | ATP-dependent protease                                                                                                                                                     | Repression of SPI1 genes via <i>FliZ</i>                                                                     | (47)                                          |
| Formate                | Short chain fatty acid                                                                                                                                                     | Activation of <i>hilA</i> and <i>hilD</i> ( see Ack Pta)                                                     | (43)                                          |
| Dimethyl sulfide/ DMSO |                                                                                                                                                                            | Repression of SPI1 genes via an unknown mechanism                                                            | (4)                                           |
| Temperature            |                                                                                                                                                                            | Activation of SPI1 genes when shifted from 25° to 37°C in H-NS-dependent manner                              | (75)                                          |
| Butyrate               | Short chain fatty acid                                                                                                                                                     | Repression of SPI1 genes via an unknown mechanism                                                            | (41)                                          |
| ppGpp                  | Small signaling molecule; stringent response during starvation                                                                                                             | Activation of <i>hilA</i> via an unknown mechanism                                                           | (79; 92; 93; 100);Ellermeier JR (unpublished) |

**TABLE S1 Regulatory factors/conditions affecting expression of SPI1**

| <b>Regulator</b> | <b>Description</b>                                                                                                       | <b>Mechanism of action/comments</b>                                                | <b>References</b> |
|------------------|--------------------------------------------------------------------------------------------------------------------------|------------------------------------------------------------------------------------|-------------------|
| FimZY            | Transcriptional regulators; control of type 1 fimbriae gene expression                                                   | Repression of <i>hilA</i> via activation of <i>hilE</i>                            | (12; 87)          |
| FimW             | negative regulator of type 1 fimbriae                                                                                    | Activation of SPI1 genes via an unknown mechanism                                  | (38)              |
| Mlc              | Transcriptional regulator; regulation of sugar uptake and metabolism                                                     | Repression of <i>hilA</i> via activation of <i>hilE</i>                            | (53)              |
| CRP              | cAMP-receptor protein                                                                                                    | Activation of invasion via an unknown mechanism                                    | (17)              |
| CpxA             | Sensor kinase, two-component regulatory system CpxRA; periplasmic stress response                                        | Activation of <i>hilA</i> via an unknown mechanism, apparently independent of CpxR | (68)              |
| Lrp              | Transcriptional regulator                                                                                                | Overproduction of Lrp represses SPI1 genes via an unknown mechanism                | (6)               |
| PmrM             | Part of the <i>pmrHFIJKLM</i> operon                                                                                     | Activation of <i>hilA</i> via an unknown mechanism                                 | (61; 65; 102)     |
| ApaH/YgdP        | Dinucleoside polyphosphate hydrolases                                                                                    | Activation of invasion via an unknown mechanism                                    | (44)              |
| PreAB (QseBC)    | Two-component regulatory system; regulation of motility and virulence in response to quorum-sensing and hormonal signals | Activation of SPI1 genes via an unknown mechanism                                  | (64; 66)          |
| LuxS             | Autoinducer 2 synthase                                                                                                   | Activation of <i>invF</i>                                                          | (19)              |
| PhoBR            | Two-component regulatory system; phosphate limitation                                                                    | Repression of <i>hilA</i> via PhoBR                                                | (59)              |

**TABLE S1 Regulatory factors/conditions affecting expression of SPI1**

| <b>Regulator</b> | <b>Description</b>                                                             | <b>Mechanism of action/comments</b>                                   | <b>References</b> |
|------------------|--------------------------------------------------------------------------------|-----------------------------------------------------------------------|-------------------|
| SprB             | Transcriptional regulator                                                      | Repression of <i>hilA</i> via repression of <i>hilD</i> transcription | (86)              |
| RamA             | AraC/XylS family transcriptional activator; regulation of multidrug resistance | Repression of SPI1 genes via an unknown mechanism                     | (7)               |
| PPK              | Polyphosphate kinase                                                           | Activation of invasion via an unknown mechanism                       | (49)              |
| PNPase           | Polynucleotide phosphorylase                                                   | Repression of SPI1 genes via an unknown mechanism                     | (21)              |
| Hfq              | RNA shaperone                                                                  | Activation of SPI1 genes                                              | (3; 90; 91)       |
| SmpB             | RNA-binding protein                                                            | Activation of SPI1 genes                                              | (3)               |
| IHF              | Nucleoid protein                                                               | Activation of <i>hilA</i> ; counteraction of H-NS mediated silencing  | (35; 83)          |
| RNAseE           | 5'-end-dependent endoribonuclease; part of degradosome complex                 | Repression of SPI1 genes; exact mechanism unclear                     | (35)              |
| Pag              |                                                                                | Repression of SPI1 genes via an unknown mechanism                     | (35)              |
| SirB             |                                                                                | Activation of <i>hilA</i> ; exact mechanism unclear                   | (84)              |
| Sig32            | Sigma factor; heat shock response                                              | Repression of <i>hilA</i> via degradation of HilD by Lon protease     | (63)              |
| ToIC/AcrAB       | Multidrug efflux pump                                                          | Activation of SPI1 genes via an unknown mechanism                     | (15; 103; 107)    |
| AsmA             | Outer membrane protein                                                         | Required for invasion; unknown mechanism                              | (80)              |
| CorA             | Mg <sup>2+</sup> channel                                                       | Activation of SPI1 genes via an unknown mechanism                     | (76; 77)          |

**TABLE S1** Regulatory factors/conditions affecting expression of SPI1

| <b>Regulator</b>                      | <b>Description</b>                              | <b>Mechanism of action/comments</b>                | <b>References</b> |
|---------------------------------------|-------------------------------------------------|----------------------------------------------------|-------------------|
| PoxA                                  | paralog of lysyl tRNA-synthetase                | Repression of SPI1 genes via an unknown mechanism  | (70)              |
| YjeK                                  | putative 2,3- $\beta$ -lysine aminomutase       | Repression of SPI1 genes via an unknown mechanism  | (70)              |
| Antimicrobial peptides                |                                                 | Repression of SPI1 genes via PhoPQ                 | (5)               |
| Macrophages                           |                                                 | Repression of SPI1 genes                           | (33; 96)          |
| Epithelial cells                      |                                                 | Activation of SPI1 genes                           | (42)              |
| Bile                                  | Role in lipid digestion                         | Repression of <i>hilA</i> via SirA                 | (81; 82)          |
| Propanediol                           | Product of decomposition of rhamnose and fucose | Repression of <i>hilA</i> via an unknown mechanism | (69)              |
| Microgravity                          | low-shear modeled microgravity                  | Repression of SPI1 genes                           | (109)             |
| Lactobacillus supernatant; probiotics |                                                 | Repression of SPI1 genes via an unknown mechanism  | (25); (13)        |
| Tetracycline                          |                                                 | Activation of SPI1 genes                           | (108)             |
| Nalidixic acid                        |                                                 | Repression of SPI1 genes                           | (26)              |
| Salicylidene acylhydrazides           |                                                 | Repression of SPI1 genes                           | (71)              |
| Fluoroquinolone resistance            |                                                 | Repression of SPI1 genes                           | (34)              |

**TABLE S2 Strains and plasmids**

| <b>Name</b> | <b>Genotype<sup>a</sup></b>                                        | <b>Deletion endpoints<sup>b</sup></b> | <b>Source or reference<sup>c</sup></b> |
|-------------|--------------------------------------------------------------------|---------------------------------------|----------------------------------------|
| 14028       | Wild type                                                          |                                       | ATCC <sup>d</sup>                      |
| JS564       | <i>ΔhilD138::Kn</i>                                                |                                       | (32)                                   |
| JS253       | <i>ΔhilD114::Cm</i>                                                |                                       | (30)                                   |
| JS749       | <i>attλ::pDX1::hilA'-lacZ</i>                                      |                                       | (54)                                   |
| JS951       | <i>ΔhilD138::Kn attλ::pDX1::hilA'-lacZ</i>                         |                                       | (20)                                   |
| JS576       | <i>ΔhilD114::Cm attλ::pDX1::hilA'-lacZ</i>                         |                                       | (32)                                   |
| JS953       | <i>tetRA-rtxA attλ::pDX1::hilA'-lacZ</i>                           |                                       | (20)                                   |
| JS955       | <i>ΔhilD138::Kn tetRA-rtxA attλ::pDX1::hilA'-lacZ</i>              |                                       | (20)                                   |
| JS488       | $\Phi(hilD'-lac^+)114$                                             |                                       |                                        |
| JS892       | $\Phi(hilD'-lacZ)hyb139$                                           |                                       | (20)                                   |
| JS996       | <i>ΔhilE115::Cm</i>                                                | 4763527-<br>4764108                   |                                        |
| JS997       | <i>ΔhilE115::Cm attλ::pDX1::hilA'-lacZ</i>                         |                                       |                                        |
| JS998       | <i>ΔhilE115::Cm ΔhilD138::Kn attλ::pDX1::hilA'-lacZ</i>            |                                       |                                        |
| JS999       | <i>ΔhilE115::Cm tetRA-rtxA attλ::pDX1::hilA'-lacZ</i>              |                                       |                                        |
| JS1000      | <i>ΔhilE115::Cm ΔhilD138::Kn tetRA-rtxA attλ::pDX1::hilA'-lacZ</i> |                                       |                                        |
| JS1001      | $\Phi(hilD'-lac^+)114 \Delta hilE115::Cm$                          |                                       |                                        |
| JS1002      | $\Phi(hilD'-lacZ)hyb139 \Delta hilE115::Cm$                        |                                       |                                        |
| JS950       | <i>ΔfliZ8042::Cm attλ::pDX1::hilA'-lacZ</i>                        |                                       | (20)                                   |
| JS1003      | $\Phi(hilD'-lac^+)114 \Delta fliZ8042::Cm$                         |                                       |                                        |
| JS1004      | $\Phi(hilD'-lacZ)hyb139 \Delta fliZ8042::Cm$                       |                                       |                                        |
| JS1006      | <i>ΔenvZ182::Cm attλ::pDX1::hilA'-lacZ</i>                         |                                       |                                        |
| JS1007      | <i>ΔenvZ182::Cm ΔhilD138::Kn attλ::pDX1::hilA'-lacZ</i>            |                                       |                                        |
| JS1008      | <i>ΔenvZ182::Cm tetRA-rtxA attλ::pDX1::hilA'-lacZ</i>              |                                       |                                        |
| JS1009      | <i>ΔenvZ182::Cm ΔhilD138::Kn tetRA-rtxA attλ::pDX1::hilA'-lacZ</i> |                                       |                                        |
| JS1010      | $\Phi(hilD'-lac^+)114 \Delta envZ182::Cm$                          |                                       |                                        |
| JS1011      | $\Phi(hilD'-lacZ)hyb139 \Delta envZ182::Cm$                        |                                       |                                        |
| JS1012      | <i>ΔfadD21::Kn</i>                                                 | 1915235-<br>1916908                   |                                        |
| JS1013      | <i>ΔfadD21::Kn attλ::pDX1::hilA'-lacZ</i>                          |                                       |                                        |
| JS1014      | <i>ΔfadD21::Kn ΔhilD114::Cm attλ::pDX1::hilA'-lacZ</i>             |                                       |                                        |
| JS1015      | <i>ΔfadD21::Kn tetRA-rtxA attλ::pDX1::hilA'-lacZ</i>               |                                       |                                        |
| JS1016      | <i>ΔfadD21::Kn ΔhilD114::Cm tetRA-rtxA attλ::pDX1::hilA'-lacZ</i>  |                                       |                                        |
| JS1017      | $\Phi(hilD'-lac^+)114 \Delta fadD21$                               |                                       |                                        |
| JS1018      | $\Phi(hilD'-lacZ)hyb139 \Delta fadD21$                             |                                       |                                        |
| JS1019      | <i>sirA3::Cm attλ::pDX1::hilA'-lacZ</i>                            |                                       |                                        |



| Name   | Genotype <sup>a</sup>                                                    | Deletion endpoints <sup>b</sup> | Source or reference <sup>c</sup> |
|--------|--------------------------------------------------------------------------|---------------------------------|----------------------------------|
| JS1020 | <i>sirA3::Cm ΔhilD138::Kn attλ::pDX1::hilA'-lacZ</i>                     |                                 |                                  |
| JS1021 | <i>sirA3::Cm tetRA-rtxA attλ::pDX1::hilA'-lacZ</i>                       |                                 |                                  |
| JS1022 | <i>sirA3::Cm ΔhilD138::Kn tetRA-rtxA attλ::pDX1::hilA'-lacZ</i>          |                                 |                                  |
| JS1023 | Φ( <i>hilD'-lac<sup>+</sup></i> )114 <i>sirA3::Cm</i>                    |                                 |                                  |
| JS1024 | Φ( <i>hilD'-lacZ</i> ) <i>hybb139 sirA3::Cm</i>                          |                                 |                                  |
| JS1025 | <i>Δdam241::Cm</i>                                                       | 3638689-<br>3639527             |                                  |
| JS1026 | <i>Δdam241::Cm attλ::pDX1::hilA'-lacZ</i>                                |                                 |                                  |
| JS1027 | <i>Δdam241::Cm ΔhilD138::Kn attλ::pDX1::hilA'-lacZ</i>                   |                                 |                                  |
| JS1028 | <i>Δdam241::Cm tetRA-rtxA attλ::pDX1::hilA'-lacZ</i>                     |                                 |                                  |
| JS1029 | <i>Δdam241::Cm ΔhilD138::Kn tetRA-rtxA attλ::pDX1::hilA'-lacZ</i>        |                                 |                                  |
| JS1030 | Φ( <i>hilD'-lac<sup>+</sup></i> )114 <i>Δdam241::Cm</i>                  |                                 |                                  |
| JS1031 | Φ( <i>hilD'-lacZ</i> ) <i>hyb139 Δdam241::Cm</i>                         |                                 |                                  |
| JS1032 | <i>Δ(ack-pta)4202::Cm</i>                                                | 2447938-<br>2451363             |                                  |
| JS1033 | <i>Δ(ack-pta)4202::Cm attλ::pDX1::hilA'-lacZ</i>                         |                                 |                                  |
| JS1034 | <i>Δ(ack-pta)4202::Cm ΔhilD138::Kn attλ::pDX1::hilA'-lacZ</i>            |                                 |                                  |
| JS1035 | <i>Δ(ack-pta)4202::Cm tetRA-rtxA attλ::pDX1::hilA'-lacZ</i>              |                                 |                                  |
| JS1036 | <i>Δ(ack-pta)4202::Cm ΔhilD138::Kn tetRA-rtxA attλ::pDX1::hilA'-lacZ</i> |                                 |                                  |
| JS1037 | Φ( <i>hilD'-lac<sup>+</sup></i> )114 <i>Δ(ack-pta)4202::Cm</i>           |                                 |                                  |
| JS1038 | Φ( <i>hilD'-lacZ</i> ) <i>hyb139 Δ(ack-pta)4202::Cm</i>                  |                                 |                                  |
| JS1180 | <i>ΔtrkA::Cm</i>                                                         | 3579771-<br>3581196             |                                  |
| JS1181 | <i>Δ trkA::Cm attλ::pDX1::hilA'-lacZ</i>                                 |                                 |                                  |
| JS1182 | <i>Δ trkA::Cm ΔhilD138::Kn attλ::pDX1::hilA'-lacZ</i>                    |                                 |                                  |
| JS1183 | <i>Δ trkA::Cm tetRA-rtxA attλ::pDX1::hilA'-lacZ</i>                      |                                 |                                  |
| JS1184 | <i>Δ trkA::Cm ΔhilD138::Kn tetRA-rtxA attλ::pDX1::hilA'-lacZ</i>         |                                 |                                  |
| JS1185 | Φ( <i>hilD'-lac<sup>+</sup></i> )114 <i>ΔtrkA::Cm</i>                    |                                 |                                  |
| JS1186 | Φ( <i>hilD'-lacZ</i> ) <i>hyb139 ΔtrkA::Cm</i>                           |                                 |                                  |
| JS1039 | <i>ΔyfgL611::Cm</i>                                                      | 2653048-<br>2654226             |                                  |
| JS1040 | <i>ΔyfgL611::Cm attλ::pDX1::hilA'-lacZ</i>                               |                                 |                                  |
| JS1041 | <i>ΔyfgL611::Cm ΔhilD138::Kn attλ::pDX1::hilA'-lacZ</i>                  |                                 |                                  |
| JS1042 | <i>ΔyfgL611::Cm tetRA-rtxA attλ::pDX1::hilA'-lacZ</i>                    |                                 |                                  |
| JS1043 | <i>ΔyfgL611::Cm ΔhilD138::Kn tetRA-rtxA attλ::pDX1::hilA'-lacZ</i>       |                                 |                                  |
| JS1044 | Φ( <i>hilD'-lac<sup>+</sup></i> )114 <i>ΔyfgL611::Cm</i>                 |                                 |                                  |
| JS1045 | Φ( <i>hilD'-lacZ</i> ) <i>hyb139 ΔyfgL611::Cm</i>                        |                                 |                                  |

| Name   | Genotype <sup>a</sup>                                                     | Deletion endpoints <sup>b</sup> | Source or reference <sup>c</sup> |
|--------|---------------------------------------------------------------------------|---------------------------------|----------------------------------|
| JS1046 | <i>Δfnr1::Cm</i>                                                          | 1754380-<br>1755116             |                                  |
| JS1047 | <i>Δfnr1::Cm attλ::pDX1::hila'-lacZ</i>                                   |                                 |                                  |
| JS1048 | <i>Δfnr1::Cm ΔhilD138::Kn attλ::pDX1::hila'-lacZ</i>                      |                                 |                                  |
| JS1049 | <i>Δfnr1::Cm tetRA-rtxA attλ::pDX1::hila'-lacZ</i>                        |                                 |                                  |
| JS1050 | <i>Δfnr1::Cm ΔhilD138::Kn tetRA-rtxA attλ::pDX1::hila'-lacZ</i>           |                                 |                                  |
| JS1051 | $\Phi(hilD'-lac^+)$ 114 <i>Δfnr1::Cm</i>                                  |                                 |                                  |
| JS1052 | $\Phi(hilD'-lacZ)hyb139$ <i>Δfnr1::Cm</i>                                 |                                 |                                  |
| JS1053 | <i>ΔycfD612::Kn</i>                                                       | 1316880                         |                                  |
| JS1054 | <i>phoQ24 ΔycfD612::Kn</i>                                                |                                 |                                  |
| JS1055 | <i>phoQ24 ΔycfD612::Kn attλ::pDX1::hila'-lacZ</i>                         |                                 |                                  |
| JS1056 | <i>phoQ24 ΔycfD612::Kn ΔhilD114::Cm attλ::pDX1::hila'-lacZ</i>            |                                 |                                  |
| JS1057 | <i>phoQ24 ΔycfD612::Kn tetRA-rtxA attλ::pDX1::hila'-lacZ</i>              |                                 |                                  |
| JS1058 | <i>phoQ24 ΔycfD612::Kn ΔhilD114::Cm tetRA-rtxA attλ::pDX1::hila'-lacZ</i> |                                 |                                  |
| JS1059 | $\Phi(hilD'-lac^+)$ 114 <i>phoQ24 ΔycfD612</i>                            |                                 |                                  |
| JS1060 | $\Phi(hilD'-lacZ)hyb139$ <i>phoQ24 ΔycfD612</i>                           |                                 |                                  |
| JS577  | <i>ΔhilC113::Cm attλ::pDX1::hila'-lacZ</i>                                |                                 |                                  |
| JS579  | <i>ΔrtsA5 attλ::pDX1::hila'-lacZ</i>                                      |                                 |                                  |
| JS1061 | <i>phoQ24 ΔycfD612::Kn ΔhilC113::Cm attλ::pDX1::hila'-lacZ</i>            |                                 |                                  |
| JS1062 | <i>phoQ24 ΔycfD612::Kn ΔrtsA5 attλ::pDX1::hila'-lacZ</i>                  |                                 |                                  |
| JS1063 | <i>Δfnr2::Tet</i>                                                         | 1754321-<br>1755129             |                                  |
| JS1064 | <i>Δfnr2::Tet attλ::pDX1::hila'-lacZ</i>                                  |                                 |                                  |
| JS1065 | <i>Δfnr2::Tet ΔhilD114::Cm attλ::pDX1::hila'-lacZ</i>                     |                                 |                                  |
| JS1066 | <i>Δfnr2::Tet ΔhilC113::Cm attλ::pDX1::hila'-lacZ</i>                     |                                 |                                  |
| JS1067 | <i>Δfnr2::Tet ΔrtsA5 attλ::pDX1::hila'-lacZ</i>                           |                                 |                                  |
| JS1068 | <i>ΔphoPQ::Cm</i>                                                         | 1317242-<br>1319310             |                                  |
| JS1069 | <i>ΔphoPQ::Cm attλ::pDX1::hila'-lacZ</i>                                  |                                 |                                  |
| JS1070 | <i>Δfnr2::Tet ΔphoPQ::Cm attλ::pDX1::hila'-lacZ</i>                       |                                 |                                  |
| JS1071 | <i>Δhha1::Cm</i>                                                          | 528131-528349                   |                                  |
| JS1072 | <i>Δhha1::Cm attλ::pDX1::hila'-lacZ</i>                                   |                                 |                                  |
| JS1073 | <i>Δhha1::Cm ΔhilD138::Kn attλ::pDX1::hila'-lacZ</i>                      |                                 |                                  |
| JS1074 | <i>Δhha1::Cm tetRA-rtxA attλ::pDX1::hila'-lacZ</i>                        |                                 |                                  |
| JS1075 | <i>Δhha1::Cm ΔhilD138::Kn tetRA-rtxA attλ::pDX1::hila'-lacZ</i>           |                                 |                                  |
| JS1076 | $\Phi(hilD'-lac^+)$ 114 <i>Δhha1::Cm</i>                                  |                                 |                                  |
| JS1077 | $\Phi(hilD'-lacZ)hyb139$ <i>Δhha1::Cm</i>                                 |                                 |                                  |

| Name   | Genotype <sup>a</sup>                                                         | Deletion endpoints <sup>b</sup> | Source or reference <sup>c</sup> |
|--------|-------------------------------------------------------------------------------|---------------------------------|----------------------------------|
| JS1078 | <i>fis-3::Cm</i>                                                              |                                 | (72), listed as JG1160)          |
| JS1079 | <i>fis-3::Cm attλ::pDX1::hila'-lacZ</i>                                       |                                 |                                  |
| JS1080 | <i>fis-3::Cm Δhild138::Kn attλ::pDX1::hila'-lacZ</i>                          |                                 |                                  |
| JS1081 | <i>fis-3::Cm tetRA-rtsA attλ::pDX1::hila'-lacZ</i>                            |                                 |                                  |
| JS1082 | <i>fis-3::Cm Δhild138::Kn tetRA-rtsA attλ::pDX1::hila'-lacZ</i>               |                                 |                                  |
| JS1083 | Φ( <i>hild'-lac<sup>+</sup></i> )114 <i>fis-3::Cm</i>                         |                                 |                                  |
| JS1084 | Φ( <i>hild'-lacZ</i> ) <i>hyb139 fis-3::Cm</i>                                |                                 |                                  |
| JS1085 | <i>ΔhupA121::Cm</i>                                                           | 4386709-<br>4386981             |                                  |
| JS1086 | <i>ΔhupB122::Cm</i>                                                           | 508105-508378                   |                                  |
| JS1087 | <i>ΔhupA121:: ΔhupB122::Cm attλ::pDX1::hila'-lacZ</i>                         |                                 |                                  |
| JS1088 | <i>ΔhupA121:: ΔhupB122::Cm Δhild138::Kn attλ::pDX1::hila'-lacZ</i>            |                                 |                                  |
| JS1089 | <i>ΔhupA121:: ΔhupB122::Cm tetRA-rtsA attλ::pDX1::hila'-lacZ</i>              |                                 |                                  |
| JS1090 | <i>ΔhupA121:: ΔhupB122::Cm Δhild138::Kn tetRA-rtsA attλ::pDX1::hila'-lacZ</i> |                                 |                                  |
| JS1091 | Φ( <i>hild'-lac<sup>+</sup></i> )114 <i>ΔhupA121:: ΔhupB122::Cm</i>           |                                 |                                  |
| JS1092 | Φ( <i>hild'-lacZ</i> ) <i>hyb139 ΔhupA121:: ΔhupB122::Cm</i>                  |                                 |                                  |
| JS1093 | <i>ΔrfaH4531::Cm</i>                                                          | 4182923-<br>4183411             |                                  |
| JS1094 | <i>ΔrfaH4531::Cm attλ::pDX1::hila'-lacZ</i>                                   |                                 |                                  |
| JS1095 | <i>ΔrfaH4531::Cm Δhild138::Kn attλ::pDX1::hila'-lacZ</i>                      |                                 |                                  |
| JS1096 | <i>ΔrfaH4531::Cm tetRA-rtsA attλ::pDX1::hila'-lacZ</i>                        |                                 |                                  |
| JS1097 | <i>ΔrfaH4531::Cm Δhild138::Kn tetRA-rtsA attλ::pDX1::hila'-lacZ</i>           |                                 |                                  |
| JS1098 | Φ( <i>hild'-lac<sup>+</sup></i> )114 <i>ΔrfaH4531::Cm</i>                     |                                 |                                  |
| JS1099 | Φ( <i>hild'-lacZ</i> ) <i>hyb139 ΔrfaH4531::Cm</i>                            |                                 |                                  |
| JS1100 | <i>ΔrelA81::Kn</i>                                                            | 3102853-<br>3105080             |                                  |
| JS1101 | <i>ΔrelA81 ΔspoT292::Cm attλ::pDX1::hila'-lacZ</i>                            |                                 |                                  |
| JS1102 | <i>ΔrelA81 ΔspoT292::Cm Δhild138::Kn attλ::pDX1::hila'-lacZ</i>               |                                 |                                  |
| JS1103 | <i>ΔrelA81 ΔspoT292::Cm tetRA-rtsA attλ::pDX1::hila'-lacZ</i>                 |                                 |                                  |
| JS1104 | <i>ΔrelA81 ΔspoT292::Cm Δhild138::Kn tetRA-rtsA attλ::pDX1::hila'-lacZ</i>    |                                 |                                  |
| JS1105 | Φ( <i>hild'-lac<sup>+</sup></i> )114 <i>ΔrelA81 ΔspoT292::Cm</i>              |                                 |                                  |
| JS1106 | Φ( <i>hild'-lacZ</i> ) <i>hyb139 ΔrelA81 ΔspoT292::Cm</i>                     |                                 |                                  |
| JS1107 | <i>Δfur41::Cm attλ::pDX1::hila'-lacZ</i>                                      |                                 |                                  |
| JS1108 | <i>Δfur41::Cm Δhild138::Kn attλ::pDX1::hila'-lacZ</i>                         |                                 |                                  |
| JS1109 | <i>Δfur41::Cm tetRA-rtsA attλ::pDX1::hila'-lacZ</i>                           |                                 |                                  |

| Name   | Genotype <sup>a</sup>                                                     | Deletion endpoints <sup>b</sup> | Source or reference <sup>c</sup> |
|--------|---------------------------------------------------------------------------|---------------------------------|----------------------------------|
| JS1110 | <i>Δfur41::Cm ΔhilD138::Kn tetRA-rtsA attλ::pDX1::hila'-lacZ</i>          |                                 |                                  |
| JS1111 | <i>Φ(hilD'-lac<sup>+</sup>)114 Δfur41::Cm</i>                             |                                 |                                  |
| JS1112 | <i>Φ(hilD'-lacZ)hyb139 Δfur41::Cm</i>                                     |                                 |                                  |
| JS1113 | <i>attλ::pDX1::hila'-lacZ hilD138</i>                                     |                                 |                                  |
| JS1114 | <i>attλ::pDX1::hila'-lacZ ΔfliZ8042</i>                                   |                                 |                                  |
| JS1115 | <i>attλ::pDX1::hila'-lacZ ΔflhDC8045 tetRA-fliZ</i>                       |                                 |                                  |
| JS1116 | <i>attλ::pDX1::hila'-lacZ hilD138 Δhile115::Cm</i>                        |                                 |                                  |
| JS1117 | <i>attλ::pDX1::hila'-lacZ ΔfliZ8042 Δhile115::Cm</i>                      |                                 |                                  |
| JS1118 | <i>attλ::pDX1::hila'-lacZ ΔflhDC8045 tetRA-fliZ Δhile115::Cm</i>          |                                 |                                  |
| JS1119 | <i>attλ::pDX1::hila'-lacZ hilD138 ΔenvZ182::Cm</i>                        |                                 |                                  |
| JS1120 | <i>attλ::pDX1::hila'-lacZ ΔfliZ8042 ΔenvZ182::Cm</i>                      |                                 |                                  |
| JS1121 | <i>attλ::pDX1::hila'-lacZ ΔflhDC8045 tetRA-fliZ ΔenvZ182::Cm</i>          |                                 |                                  |
| JS1122 | <i>attλ::pDX1::hila'-lacZ hilD138 ΔfadD21::Kn</i>                         |                                 |                                  |
| JS1123 | <i>attλ::pDX1::hila'-lacZ ΔfliZ8042 ΔfadD21::Kn</i>                       |                                 |                                  |
| JS1124 | <i>attλ::pDX1::hila'-lacZ ΔflhDC8045 tetRA-fliZ ΔfadD21::Kn</i>           |                                 |                                  |
| JS1125 | <i>attλ::pDX1::hila'-lacZ hilD138 sirA3::Cm</i>                           |                                 |                                  |
| JS1126 | <i>attλ::pDX1::hila'-lacZ ΔfliZ8042 sirA3::Cm</i>                         |                                 |                                  |
| JS1127 | <i>attλ::pDX1::hila'-lacZ ΔflhDC8045 tetRA-fliZ sirA3::Cm</i>             |                                 |                                  |
| JS1128 | <i>attλ::pDX1::hila'-lacZ hilD138 Δdam241::Cm</i>                         |                                 |                                  |
| JS1129 | <i>attλ::pDX1::hila'-lacZ ΔfliZ8042 Δdam241::Cm</i>                       |                                 |                                  |
| JS1130 | <i>attλ::pDX1::hila'-lacZ ΔflhDC8045 tetRA-fliZ Δdam241::Cm</i>           |                                 |                                  |
| JS1131 | <i>attλ::pDX1::hila'-lacZ hilD138 Δ(ack-pta)4202::Cm</i>                  |                                 |                                  |
| JS1132 | <i>attλ::pDX1::hila'-lacZ ΔfliZ8042 Δ(ack-pta)4202::Cm</i>                |                                 |                                  |
| JS1133 | <i>attλ::pDX1::hila'-lacZ ΔflhDC8045 tetRA-fliZ Δ(ack-pta)4202::Cm</i>    |                                 |                                  |
| JS1134 | <i>attλ::pDX1::hila'-lacZ hilD138 ΔyfgL611::Cm</i>                        |                                 |                                  |
| JS1135 | <i>attλ::pDX1::hila'-lacZ ΔfliZ8042 ΔyfgL611::Cm</i>                      |                                 |                                  |
| JS1136 | <i>attλ::pDX1::hila'-lacZ ΔflhDC8045 tetRA-fliZ ΔyfgL611::Cm</i>          |                                 |                                  |
| JS1137 | <i>attλ::pDX1::hila'-lacZ hilD138 Δhha1::Cm</i>                           |                                 |                                  |
| JS1138 | <i>attλ::pDX1::hila'-lacZ ΔfliZ8042 Δhha1::Cm</i>                         |                                 |                                  |
| JS1139 | <i>attλ::pDX1::hila'-lacZ ΔflhDC8045 tetRA-fliZ Δhha1::Cm</i>             |                                 |                                  |
| JS1140 | <i>attλ::pDX1::hila'-lacZ hilD138 fis-3::Cm</i>                           |                                 |                                  |
| JS1141 | <i>attλ::pDX1::hila'-lacZ ΔfliZ8042 Δfis::Cm</i>                          |                                 |                                  |
| JS1142 | <i>attλ::pDX1::hila'-lacZ ΔflhDC8045 tetRA-fliZ fis-3::Cm</i>             |                                 |                                  |
| JS1143 | <i>attλ::pDX1::hila'-lacZ hilD138 ΔhupA121 ΔhupB122::Cm</i>               |                                 |                                  |
| JS1144 | <i>attλ::pDX1::hila'-lacZ ΔfliZ8042 ΔhupA121 ΔhupB122::Cm</i>             |                                 |                                  |
| JS1145 | <i>attλ::pDX1::hila'-lacZ ΔflhDC8045 tetRA-fliZ ΔhupA121 ΔhupB122::Cm</i> |                                 |                                  |
| JS1146 | <i>attλ::pDX1::hila'-lacZ hilD138 ΔrfaH4531::Cm</i>                       |                                 |                                  |

| Name              | Genotype <sup>a</sup>                                                        | Deletion endpoints <sup>b</sup> | Source or reference <sup>c</sup> |
|-------------------|------------------------------------------------------------------------------|---------------------------------|----------------------------------|
| JS1147            | <i>attλ::pDX1::hilA'-lacZ ΔfliZ8042 ΔrfaH4531::Cm</i>                        |                                 |                                  |
| JS1148            | <i>attλ::pDX1::hilA'-lacZ ΔflhDC8045 tetRA-fliZ ΔrfaH4531::Cm</i>            |                                 |                                  |
| JS1149            | <i>attλ::pDX1::hilA'-lacZ hild138 ΔrelA81::Kn ΔspoT292::Cm</i>               |                                 |                                  |
| JS1150            | <i>attλ::pDX1::hilA'-lacZ ΔfliZ8042 ΔrelA81::Kn ΔspoT292::Cm</i>             |                                 |                                  |
| JS1151            | <i>attλ::pDX1::hilA'-lacZ ΔflhDC8045 tetRA-fliZ ΔrelA81::Kn ΔspoT292::Cm</i> |                                 |                                  |
| JS1152            | <i>attλ::pDX1::hilA'-lacZ hild138 Δfur41::Cm</i>                             |                                 |                                  |
| JS1153            | <i>attλ::pDX1::hilA'-lacZ ΔfliZ8042 Δfur41::Cm</i>                           |                                 |                                  |
| JS1154            | <i>attλ::pDX1::hilA'-lacZ ΔflhDC8045 tetRA-fliZ Δfur41::Cm</i>               |                                 |                                  |
| JS1155            | <i>ΔflhDC8045::Cm</i>                                                        | 2022064-<br>2021175             |                                  |
| JS1156            | <i>attλ::pDX1::hilA'-lacZ ΔflhDC8045::Cm</i>                                 |                                 |                                  |
| JS1157            | <i>attλ::pDX1::hilA'-lacZ hild138 ΔflhDC8045::Cm</i>                         |                                 |                                  |
| JS1158            | <i>attλ::pDX1::hilA'-lacZ ΔfliZ8042 ΔflhDC8045::Cm</i>                       |                                 |                                  |
| JS1159            | <i>ΔtdcA51::Cm</i>                                                           | 3412473-<br>3413411             |                                  |
| JS1160            | <i>attλ::pDX1::hilA'-lacZ ΔtdcA51::Cm</i>                                    |                                 |                                  |
| JS1161            | <i>attλ::pDX1::hilA'-lacZ hild138 ΔtdcA51::Cm</i>                            |                                 |                                  |
| JS1162            | <i>attλ::pDX1::hilA'-lacZ ΔfliZ8042 ΔtdcA51::Cm</i>                          |                                 |                                  |
| JS1163            | <i>attλ::pDX1::hilA'-lacZ ΔflhDC8045 tetRA-fliZ ΔtdcA51::Cm</i>              |                                 |                                  |
| Plasmids          | Relevant Characteristics                                                     | Cloned End Points               |                                  |
| pKD46             | <i>bla</i> P <sub>BAD</sub> <i>gam bet exo</i> pSC101 oriTS                  |                                 | (24)                             |
| pCP20             | <i>bla cat cI857 λP<sub>R</sub> flp</i> pSC101 oriTS                         |                                 | (18)                             |
| pKD3              | <i>bla</i> FRT <i>cat</i> FRT PS1 PS2 oriR6K                                 |                                 | (24)                             |
| pKD4              | <i>bla</i> FRT <i>aph</i> FRT PS1 PS2 oriR6K                                 |                                 | (24)                             |
| pWKS30            | pSC101 ori, Ap <sup>f</sup>                                                  |                                 | (106)                            |
| pRfaH<br>(pKG115) | pWKS30:: <i>rfaH</i> <sup>+</sup>                                            | 4182924-<br>4183440             |                                  |

<sup>a</sup> All strains are isogenic derivatives of ATCC 14028.

<sup>b</sup> The numbers indicate the base pairs that are deleted (strains) or cloned (plasmids) (inclusive) as defined in the *S. enterica* serovar Typhimurium LT2 genome sequence in the National Center for Biotechnology Information database.

<sup>c</sup> This study unless specified otherwise.

<sup>d</sup> ATCC, American Type Culture Collection.

**TABLE S3 Transcriptomic datasets that reveal co-regulation of SPI 1 and flagellar genes in *Salmonella Typhimurium***

| Global response to a regulatory system or specific environmental stimuli | Reference  | Regulates <i>hilA</i> through <i>FliZ</i> ? <sup>a</sup> | Class of SPI1 regulator |
|--------------------------------------------------------------------------|------------|----------------------------------------------------------|-------------------------|
| Macrophage                                                               | (33)       | ND                                                       |                         |
| CsrA <sup>b</sup>                                                        | (51)       | no                                                       | II                      |
| Antimicrobial peptides                                                   | (5)        | ND                                                       |                         |
| Bile                                                                     | (81)       | no                                                       |                         |
| Swarming                                                                 | (104; 105) | ND                                                       |                         |
| Fis                                                                      | (48)       | no                                                       | IV                      |
| RfaH                                                                     | (67)       | no                                                       | IV                      |
| YfgL                                                                     | (37)       | no                                                       | II                      |
| Fnr                                                                      | (39)       | no                                                       | III                     |
| Hydrogen peroxide                                                        | (40)       | ND                                                       |                         |

<sup>a</sup> No indicates that the factor regulates *hilA* in a *fliZ* null background and when *FliZ* is ectopically expressed. ND - Not Determined

<sup>b</sup> Effect of the loss of *SirA* was tested

#### LITERATURE CITED

1. Altier, C., M. Suyemoto, and S. D. Lawhon, 2000 Regulation of *Salmonella enterica* serovar Typhimurium invasion genes by *csrA*. *Infect.Immun.* **68**: 6790-6797.
2. Amy, M., P. Velge, D. Senocq, E. Bottreau, F. Mompарт *et al.* 2004 Identification of a new *Salmonella enterica* serovar Enteritidis locus involved in cell invasion and in the colonisation of chicks. *Res.Microbiol.* **155**: 543-552.
3. Ansong, C., H. Yoon, S. Porwollik, H. Mottaz-Brewer, B. O. Petritis *et al.* 2009 Global systems-level analysis of Hfq and SmpB deletion mutants in *Salmonella*: implications for virulence and global protein translation. *PLoS.One.* **4**: e4809.
4. Antunes, L. C., M. M. Buckner, S. D. Auweter, R. B. Ferreira, P. Lolic *et al.* 2010 Inhibition of *Salmonella* host cell invasion by dimethyl sulfide. *Appl.Environ.Microbiol.* **76**: 5300-5304.
5. Bader, M. W., W. W. Navarre, W. Shiau, H. Nikaido, J. G. Frye *et al.* 2003 Regulation of *Salmonella typhimurium* virulence gene expression by cationic antimicrobial peptides. *Mol.Microbiol.* **50**: 219-230.
6. Baek, C. H., S. Wang, K. L. Roland, and R. Curtiss, III, 2009 Leucine-responsive regulatory protein (Lrp) acts as a virulence repressor in *Salmonella enterica* serovar Typhimurium. *J. Bacteriol.* **191**: 1278-1292.
7. Bailey, A. M., A. Ivens, R. Kingsley, J. L. Cottell, J. Wain *et al.* 2010 RamA, a member of the AraC/XylS family, influences both virulence and efflux in *Salmonella enterica* serovar Typhimurium. *J. Bacteriol.* **192**: 1607-1616.
8. Bajaj, V., C. Hwang, and C. A. Lee, 1995 *hilA* is a novel ompR/toxR family member that activates the expression of *Salmonella typhimurium* invasion genes. *Mol.Microbiol.* **18**: 715-727.
9. Bajaj, V., R. L. Lucas, C. Hwang, and C. A. Lee, 1996 Co-ordinate regulation of *Salmonella typhimurium* invasion genes by environmental and regulatory factors is mediated by control of *hilA* expression. *Mol.Microbiol.* **22**: 703-714.
10. Baxter M. & Jones B.D. Identification of regulatory pathways that translate environmental signals into changes in expression of *Salmonella* motility, adherence, and invasion. 103rd General Meeting of the American Society for Microbiology abstr. D-110. 2003 Ref Type: Abstract.
11. Baxter, M. A., T. F. Fahlen, R. L. Wilson, and B. D. Jones, 2003 HilE interacts with HilD and negatively regulates *hilA* transcription and expression of the *Salmonella enterica* serovar Typhimurium invasive phenotype. *Infect.Immun.* **71**: 1295-1305.
12. Baxter, M. A., and B. D. Jones, 2005 The *fimYZ* Genes Regulate *Salmonella enterica* serovar Typhimurium Invasion in Addition to Type 1 Fimbrial Expression and Bacterial Motility. *Infect.Immun.* **73**: 1377-1385.
13. Bayoumi, M. A., and M. W. Griffiths, 2010 Probiotics down-regulate genes in *Salmonella enterica* serovar Typhimurium pathogenicity islands 1 and 2. *J.Food Prot.* **73**: 452-460.
14. Behlau, I., and S. I. Miller, 1993 A PhoP-repressed gene promotes *Salmonella typhimurium* invasion of epithelial cells. *J. Bacteriol.* **175**: 4475-4484.
15. Blair, J. M., R. M. La Ragione, M. J. Woodward, and L. J. Piddock, 2009 Periplasmic adaptor protein AcrA has a distinct role in the antibiotic resistance and virulence of *Salmonella enterica* serovar Typhimurium. *J.Antimicrob.Chemother.* **64**: 965-972.
16. Boddicker, J. D., and B. D. Jones, 2004 Lon protease activity causes down-regulation of *Salmonella* pathogenicity island 1 invasion gene expression after infection of epithelial cells. *Infect.Immun.* **72**: 2002-2013.

17. Chen, Z. W., S. L. Hsuan, J. W. Liao, T. H. Chen, C. M. Wu *et al.* 2010 Mutations in the *Salmonella enterica* serovar Choleraesuis cAMP-receptor protein gene lead to functional defects in the SPI-1 Type III secretion system. *Vet.Res.* **41**: 5.
18. Cherepanov, P. P., and W. Wackernagel, 1995 Gene disruption in *Escherichia coli*: TcR and KmR cassettes with the option of Flp-catalyzed excision of the antibiotic-resistance determinant. *Gene* **158**: 9-14.
19. Choi, J., D. Shin, and S. Ryu, 2007 Implication of quorum sensing in *Salmonella enterica* serovar Typhimurium virulence: the *luxS* gene is necessary for expression of genes in pathogenicity island 1. *Infect.Immun.* **75**: 4885-4890.
20. Chubiz, J. E., Y. A. Golubeva, D. Lin, L. D. Miller, and J. M. Slauch, 2010 FlhZ regulates expression of the *Salmonella* pathogenicity island 1 invasion locus by controlling HilD protein activity in *Salmonella enterica* serovar Typhimurium. *J. Bacteriol.* **192**: 6261-6270.
21. Clements, M. O., S. Eriksson, A. Thompson, S. Lucchini, J. C. Hinton *et al.* 2002 Polynucleotide phosphorylase is a global regulator of virulence and persistency in *Salmonella enterica*. *Proc.Natl.Acad.Sci.U.S.A* **99**: 8784-8789.
22. Croinin, O., and C. J. Dorman, 2007 Expression of the Fis protein is sustained in late-exponential- and stationary-phase cultures of *Salmonella enterica* serovar Typhimurium grown in the absence of aeration. *Mol.Microbiol.* **66**: 237-251.
23. Darwin, K. H., and V. L. Miller, 1999 InvF is required for expression of genes encoding proteins secreted by the SPI1 type III secretion apparatus in *Salmonella typhimurium*. *J. Bacteriol.* **181**: 4949-4954.
24. Datsenko, K. A., and B. L. Wanner, 2000 One-step inactivation of chromosomal genes in *Escherichia coli* K-12 using PCR products. *Proc.Natl.Acad.Sci.U.S.A* **97**: 6640-6645.
25. De Keersmaecker, S. C., K. Marchal, T. L. Verhoeven, K. Engelen, J. Vanderleyden *et al.* 2005 Microarray analysis and motif detection reveal new targets of the *Salmonella enterica* serovar Typhimurium HilA regulatory protein, including *hilA* itself. *J. Bacteriol.* **187**: 4381-4391.
26. Dowd, S. E., K. Killinger-Mann, J. Blanton, F. M. San, and M. Brashears, 2007 Positive adaptive state: microarray evaluation of gene expression in *Salmonella enterica* Typhimurium exposed to nalidixic acid. *Foodborne.Pathog.Dis.* **4**: 187-200.
27. Eichelberg, K., and J. E. Galan, 1999 Differential regulation of *Salmonella typhimurium* type III secreted proteins by pathogenicity island 1 (SPI-1)-encoded transcriptional activators InvF and HilA. *Infect.Immun.* **67**: 4099-4105.
28. Eichelberg, K., W. D. Hardt, and J. E. Galan, 1999 Characterization of SprA, an AraC-like transcriptional regulator encoded within the *Salmonella typhimurium* pathogenicity island 1. *Mol.Microbiol.* **33**: 139-152.
29. Ellermeier, C. D., J. R. Ellermeier, and J. M. Slauch, 2005 HilD, HilC and RtsA constitute a feed forward loop that controls expression of the SPI1 type three secretion system regulator *hilA* in *Salmonella enterica* serovar Typhimurium. *Mol.Microbiol.* **57**: 691-705.
30. Ellermeier, C. D., and J. M. Slauch, 2003 RtsA and RtsB coordinately regulate expression of the invasion and flagellar genes in *Salmonella enterica* serovar Typhimurium. *J. Bacteriol.* **185**: 5096-5108.
31. Ellermeier, C. D., and J. M. Slauch, 2004 RtsA coordinately regulates DsbA and the *Salmonella* pathogenicity island 1 type III secretion system. *J. Bacteriol.* **186**: 68-79.
32. Ellermeier, J. R., and J. M. Slauch, 2008 Fur regulates expression of the *Salmonella* pathogenicity island 1 type III secretion system through HilD. *J. Bacteriol.* **190**: 476-486.



33. Eriksson, S., S. Lucchini, A. Thompson, M. Rhen, and J. C. Hinton, 2003 Unravelling the biology of macrophage infection by gene expression profiling of intracellular *Salmonella enterica*. *Mol.Microbiol.* **47**: 103-118.
34. Fabrega, A., M. L. du, B. C. Le, M. T. Jimenez de Anta, and J. Vila, 2009 Repression of invasion genes and decreased invasion in a high-level fluoroquinolone-resistant *Salmonella typhimurium* mutant. *PLoS.One.* **4**: e8029.
35. Fahlen, T. F., N. Mathur, and B. D. Jones, 2000 Identification and characterization of mutants with increased expression of *hilA*, the invasion gene transcriptional activator of *Salmonella typhimurium*. *FEMS Immunol.Med.Microbiol* **28**: 25-35.
36. Fahlen, T. F., R. L. Wilson, J. D. Boddicker, and B. D. Jones, 2001 Hha is a negative modulator of transcription of *hilA*, the *Salmonella enterica* serovar Typhimurium invasion gene transcriptional activator. *J. Bacteriol.* **183**: 6620-6629.
37. Fardini, Y., K. Chettab, O. Grepinet, S. Rochereau, J. Trotureau *et al.* 2007 The YfgL lipoprotein is essential for type III secretion system expression and virulence of *Salmonella enterica* serovar Enteritidis. *Infect.Immun.* **75**: 358-370.
38. Field, T. R., A. N. Layton, J. Bispham, M. P. Stevens, and E. E. Galyov, 2008 Identification of novel genes and pathways affecting *Salmonella* type III secretion system 1 using a contact-dependent hemolysis assay. *J. Bacteriol.* **190**: 3393-3398.
39. Fink, R. C., M. R. Evans, S. Porwollik, A. Vazquez-Torres, J. Jones-Carson *et al.* 2007 FNR is a global regulator of virulence and anaerobic metabolism in *Salmonella enterica* serovar Typhimurium (ATCC 14028s). *J. Bacteriol.* **189**: 2262-2273.
40. Frye, J. G., S. Porwollik, F. Blackmer, P. Cheng, and M. McClelland, 2005 Host gene expression changes and DNA amplification during temperate phage induction. *J. Bacteriol.* **187**: 1485-1492.
41. Gantois, I., R. Ducatelle, F. Pasmans, F. Haesebrouck, I. Hautefort *et al.* 2006 Butyrate specifically down-regulates *Salmonella* pathogenicity island 1 gene expression. *Appl.Environ.Microbiol.* **72**: 946-949.
42. Hautefort, I., A. Thompson, S. Eriksson-Ygberg, M. L. Parker, S. Lucchini *et al.* 2008 During infection of epithelial cells *Salmonella enterica* serovar Typhimurium undergoes a time-dependent transcriptional adaptation that results in simultaneous expression of three type 3 secretion systems. *Cell Microbiol.* **10**: 958-984.
43. Huang, Y., M. Suyemoto, C. D. Garner, K. M. Cicconi, and C. Altier, 2008 Formate acts as a diffusible signal to induce *Salmonella* invasion. *J. Bacteriol.* **190**: 4233-4241.
44. Ismail, T. M., C. A. Hart, and A. G. McLennan, 2003 Regulation of dinucleoside polyphosphate pools by the YgdP and ApaH hydrolases is essential for the ability of *Salmonella enterica* serovar Typhimurium to invade cultured mammalian cells. *Journal of Biological Chemistry* **278**: 32602-32607.
45. Iyoda, S., T. Kamidoi, K. Hirose, K. Kutsukake, and H. Watanabe, 2001 A flagellar gene *fliZ* regulates the expression of invasion genes and virulence phenotype in *Salmonella enterica* serovar Typhimurium. *Microb.Pathog.* **30**: 81-90.
46. Johnston, C., D. A. Pegues, C. J. Hueck, A. Lee, and S. I. Miller, 1996 Transcriptional activation of *Salmonella typhimurium* invasion genes by a member of the phosphorylated response-regulator superfamily. *Mol.Microbiol.* **22**: 715-727.
47. Kage, H., A. Takaya, M. Ohya, and T. Yamamoto, 2008 Coordinated regulation of expression of *Salmonella* pathogenicity island 1 and flagellar type III secretion systems by ATP-dependent ClpXP protease. *J. Bacteriol.* **190**: 2470-2478.

48. Kelly, A., M. D. Goldberg, R. K. Carroll, V. Danino, J. C. Hinton *et al.* 2004 A global role for Fis in the transcriptional control of metabolism and type III secretion in *Salmonella enterica* serovar Typhimurium. *Microbiology* **150**: 2037-2053.
49. Kim, K. S., N. N. Rao, C. D. Fraley, and A. Kornberg, 2002 Inorganic polyphosphate is essential for long-term survival and virulence factors in *Shigella* and *Salmonella* spp. *Proc.Natl.Acad.Sci.U.S.A* **99**: 7675-7680.
50. Kim, M., S. Lim, D. Kim, H. E. Choy, and S. Ryu, 2009 A *tdcA* mutation reduces the invasive ability of *Salmonella enterica* serovar Typhimurium. *Mol.Cells* **28**: 389-395.
51. Lawhon, S. D., J. G. Frye, M. Suyemoto, S. Porwollik, M. McClelland *et al.* 2003 Global regulation by CsrA in *Salmonella typhimurium*. *Mol.Microbiol.* **48**: 1633-1645.
52. Lawhon, S. D., R. Maurer, M. Suyemoto, and C. Altier, 2002 Intestinal short-chain fatty acids alter *Salmonella typhimurium* invasion gene expression and virulence through BarA/SirA. *Mol.Microbiol.* **46**: 1451-1464.
53. Lim, S., J. Yun, H. Yoon, C. Park, B. Kim *et al.* 2007 Mlc regulation of *Salmonella* pathogenicity island I gene expression via *hilE* repression. *Nucleic Acids Res.* **35**: 1822-1832.
54. Lin, D., C. V. Rao, and J. M. Slauch, 2008 The *Salmonella* SPI1 type three secretion system responds to periplasmic disulfide bond status via the flagellar apparatus and the RcsCDB system. *J. Bacteriol.* **190**: 87-97.
55. Lopez-Garrido, J., and J. Casadesus, 2010 Regulation of *Salmonella enterica* pathogenicity island 1 by DNA adenine methylation. *Genetics* **184**: 637-649.
56. Lostroh, C. P., V. Bajaj, and C. A. Lee, 2000 The cis requirements for transcriptional activation by HilA, a virulence determinant encoded on SPI-1. *Mol.Microbiol.* **37**: 300-315.
57. Lostroh, C. P., and C. A. Lee, 2001 The HilA box and sequences outside it determine the magnitude of HilA-dependent activation of P(*prgH*) from *Salmonella* pathogenicity island 1. *J. Bacteriol.* **183**: 4876-4885.
58. Lucas, R. L., and C. A. Lee, 2001 Roles of *hilC* and *hilD* in regulation of *hilA* expression in *Salmonella enterica* serovar Typhimurium. *J. Bacteriol.* **183**: 2733-2745.
59. Lucas, R. L., C. P. Lostroh, C. C. DiRusso, M. P. Spector, B. L. Wanner *et al.* 2000 Multiple factors independently regulate *hilA* and invasion gene expression in *Salmonella enterica* serovar Typhimurium. *J. Bacteriol.* **182**: 1872-1882.
60. Mangan, M. W., S. Lucchini, O. Croinin, S. Fitzgerald, J. C. Hinton *et al.* 2011 The nucleoid-associated protein HU controls three regulons that coordinate virulence, response to stress and general physiology in *Salmonella enterica* serovar Typhimurium. *Microbiology* PMID:21212121.
61. Marchal, K., K. S. De, P. Monsieurs, B. N. van, K. Lemmens *et al.* 2004 In silico identification and experimental validation of PmrAB targets in *Salmonella typhimurium* by regulatory motif detection. *Genome Biol.* **5**: R9.
62. Martinez, L. C., H. Yakhnin, M. I. Camacho, D. Georgellis, P. Babitzke *et al.* 2011 Integration of a complex regulatory cascade involving the SirA/BarA and Csr global regulatory systems that controls expression of the *Salmonella* SPI-1 and SPI-2 virulence regulons through HilD. *Mol.Microbiol.* **80**: 1637-1656.
63. Matsui, M., A. Takaya, and T. Yamamoto, 2008 Sigma32-mediated negative regulation of *Salmonella* pathogenicity island 1 expression. *J. Bacteriol.* **190**: 6636-6645.
64. Merighi, M., A. N. Septer, A. Carroll-Portillo, A. Bhatiya, S. Porwollik *et al.* 2009 Genome-wide analysis of the PreA/PreB (QseB/QseC) regulon of *Salmonella enterica* serovar Typhimurium. *BMC.Microbiol.* **9**: 42.
65. Monsieurs, P., K. S. De, W. W. Navarre, M. W. Bader, S. F. De *et al.* 2005 Comparison of the PhoPQ regulon in *Escherichia coli* and *Salmonella typhimurium*. *J.Mol.Evol.* **60**: 462-474.

66. Moreira, C. G., D. Weinshenker, and V. Sperandio, 2010 QseC mediates *Salmonella enterica* serovar typhimurium virulence in vitro and in vivo. *Infect.Immun.* **78**: 914-926.
67. Nagy, G., V. Danino, U. Dobrindt, M. Pallen, R. Chaudhuri *et al.* 2006 Down-regulation of key virulence factors makes the *Salmonella enterica* serovar Typhimurium *rfaH* mutant a promising live-attenuated vaccine candidate. *Infect.Immun.* **74**: 5914-5925.
68. Nakayama, S., A. Kushiro, T. Asahara, R. Tanaka, L. Hu *et al.* 2003 Activation of *hilA* expression at low pH requires the signal sensor CpxA, but not the cognate response regulator CpxR, in *Salmonella enterica* serovar Typhimurium. *Microbiology* **149**: 2809-2817.
69. Nakayama, S., and H. Watanabe, 2006 Mechanism of *hilA* repression by 1,2-propanediol consists of two distinct pathways, one dependent on and the other independent of catabolic production of propionate, in *Salmonella enterica* serovar Typhimurium. *J. Bacteriol.* **188**: 3121-3125.
70. Navarre, W. W., S. B. Zou, H. Roy, J. L. Xie, A. Savchenko *et al.* 2010 PoxA, yjeK, and elongation factor P coordinately modulate virulence and drug resistance in *Salmonella enterica*. *Mol.Cell* **39**: 209-221.
71. Negrea, A., E. Bjur, S. E. Ygberg, M. Elofsson, H. Wolf-Watz *et al.* 2007 Salicylidene acylhydrazides that affect type III protein secretion in *Salmonella enterica* serovar Typhimurium. *Antimicrob.Agents Chemother.* **51**: 2867-2876.
72. Numrych, T. E., R. I. Gumpert, and J. F. Gardner, 1991 A genetic analysis of Xis and FIS interactions with their binding sites in bacteriophage lambda. *J. Bacteriol.* **173**: 5954-5963.
73. Olekhovich, I. N., and R. J. Kadner, 2006 Crucial roles of both flanking sequences in silencing of the *hilA* promoter in *Salmonella enterica*. *J.Mol.Biol.* **357**: 373-386.
74. Olekhovich, I. N., and R. J. Kadner, 2007 Role of nucleoid-associated proteins Hha and H-NS in expression of *Salmonella enterica* activators HilD, HilC, and RtsA required for cell invasion. *J. Bacteriol.* **189**: 6882-6890.
75. Ono, S., M. D. Goldberg, T. Olsson, D. Esposito, J. C. Hinton *et al.* 2005 H-NS is a part of a thermally controlled mechanism for bacterial gene regulation. *Biochem.J.* **391**: 203-213.
76. Papp-Wallace, K. M., and M. E. Maguire, 2008 Regulation of CorA Mg<sup>2+</sup> channel function affects the virulence of *Salmonella enterica* serovar Typhimurium. *J. Bacteriol.* **190**: 6509-6516.
77. Papp-Wallace, K. M., M. Nartea, D. G. Kehres, S. Porwollik, M. McClelland *et al.* 2008 The CorA Mg<sup>2+</sup> channel is required for the virulence of *Salmonella enterica* serovar Typhimurium. *J. Bacteriol.* **190**: 6517-6523.
78. Pegues, D. A., M. J. Hantman, I. Behlau, and S. I. Miller, 1995 PhoP/PhoQ transcriptional repression of *Salmonella typhimurium* invasion genes: evidence for a role in protein secretion. *Mol.Microbiol.* **17**: 169-181.
79. Pizarro-Cerda, J., and K. Tedin, 2004 The bacterial signal molecule, ppGpp, regulates *Salmonella virulence* gene expression. *Mol.Microbiol.* **52**: 1827-1844.
80. Prieto, A. I., S. B. Hernandez, I. Cota, M. G. Pucciarelli, Y. Orlov *et al.* 2009 Roles of the outer membrane protein AsmA of *Salmonella enterica* in the control of *marRAB* expression and invasion of epithelial cells. *J. Bacteriol.* **191**: 3615-3622.
81. Prouty, A. M., I. E. Brodsky, J. Manos, R. Belas, S. Falkow *et al.* 2004 Transcriptional regulation of *Salmonella enterica* serovar Typhimurium genes by bile. *FEMS Immunol.Med.Microbiol* **41**: 177-185.
82. Prouty, A. M., and J. S. Gunn, 2000 *Salmonella enterica* serovar Typhimurium invasion is repressed in the presence of bile. *Infect.Immun.* **68**: 6763-6769.
83. Queiroz, M. H., C. Madrid, S. Paytubi, C. Balsalobre, and A. Juarez, 2011 Integration Host Factor alleviates H-

- NS silencing of the *Salmonella enterica* serovar Typhimurium master regulator of SPI1, *hilA*. Microbiology PMID:21680637.
84. Rakeman, J. L., H. R. Bonifield, and S. I. Miller, 1999 A HilA-independent pathway to *Salmonella typhimurium* invasion gene transcription. J. Bacteriol. **181**: 3096-3104.
  85. Saini, S., S. Koirala, E. Floess, P. J. Mears, Y. R. Chemla *et al.* 2010 FlhZ induces a kinetic switch in flagellar gene expression. J. Bacteriol. **192**: 6477-6481.
  86. Saini, S., and C. V. Rao, 2010 SprB is the molecular link between *Salmonella* pathogenicity island 1 (SPI1) and SPI4. J. Bacteriol. **192**: 2459-2462.
  87. Saini, S., J. M. Slauch, P. D. Aldridge, and C. V. Rao, 2010 Role of cross talk in regulating the dynamic expression of the flagellar, *Salmonella* pathogenicity island 1 and type 1 fimbrial genes. J. Bacteriol. **192**: 5767-5777.
  88. Schechter, L. M., S. M. Damrauer, and C. A. Lee, 1999 Two AraC/XylS family members can independently counteract the effect of repressing sequences upstream of the *hilA* promoter. Mol Microbiol **32**: 629-642.
  89. Schechter, L. M., S. Jain, S. Akbar, and C. A. Lee, 2003 The small nucleoid-binding proteins H-NS, HU, and Fis affect *hilA* expression in *Salmonella enterica* serovar Typhimurium. Infect.Immun. **71**: 5432-5435.
  90. Sittka, A., S. Lucchini, K. Papenfort, C. M. Sharma, K. Rolle *et al.* 2008 Deep sequencing analysis of small noncoding RNA and mRNA targets of the global post-transcriptional regulator, Hfq. PLoS.Genet. **4**: e1000163.
  91. Sittka, A., V. Pfeiffer, K. Tedin, and J. Vogel, 2007 The RNA chaperone Hfq is essential for the virulence of *Salmonella typhimurium*. Mol.Microbiol. **63**: 193-217.
  92. Song, M., H. J. Kim, E. Y. Kim, M. Shin, H. C. Lee *et al.* 2004 ppGpp-dependent stationary phase induction of genes on *Salmonella* pathogenicity island 1. Journal of Biological Chemistry **279**: 34183-34190.
  93. Song, M., H. J. Kim, S. Ryu, H. Yoon, J. Yun *et al.* 2010 ppGpp-mediated stationary phase induction of the genes encoded by horizontally acquired pathogenicity islands and *cob/pdu* locus in *Salmonella enterica* serovar Typhimurium. J.Microbiol. **48**: 89-95.
  94. Su, J., H. Gong, J. Lai, A. Main, and S. Lu, 2009 The potassium transporter Trk and external potassium modulate *Salmonella enterica* protein secretion and virulence. Infect.Immun. **77**: 667-675.
  95. Takaya, A., Y. Kubota, E. Isogai, and T. Yamamoto, 2005 Degradation of the HilC and HilD regulator proteins by ATP-dependent Lon protease leads to downregulation of *Salmonella* pathogenicity island 1 gene expression. Mol.Microbiol. **55**: 839-852.
  96. Takaya, A., A. Suzuki, Y. Kikuchi, M. Eguchi, E. Isogai *et al.* 2005 Derepression of *Salmonella* pathogenicity island 1 genes within macrophages leads to rapid apoptosis via caspase-1- and caspase-3-dependent pathways. Cell Microbiol. **7**: 79-90.
  97. Takaya, A., T. Tomoyasu, A. Tokumitsu, M. Morioka, and T. Yamamoto, 2002 The ATP-dependent Lon protease of *Salmonella enterica* serovar Typhimurium regulates invasion and expression of genes carried on *Salmonella* pathogenicity island 1. J. Bacteriol. **184**: 224-232.
  98. Teixeira, L., B. Carrasco, J. C. Alonso, J. Barbe, and S. Campoy, 2011 Fur Activates the Expression of *Salmonella enterica* Pathogenicity Island 1 by Directly Interacting with the *hilD* Operator In Vivo and In Vitro. PLoS.One. **6**: e19711.
  99. Teplitski, M., R. I. Goodier, and B. M. Ahmer, 2003 Pathways leading from BarA/SirA to motility and virulence gene expression in *Salmonella*. J. Bacteriol. **185**: 7257-7265.

100. Thompson, A., M. D. Rolfe, S. Lucchini, P. Schwerk, J. C. Hinton *et al.* 2006 The bacterial signal molecule, ppGpp, mediates the environmental regulation of both the invasion and intracellular virulence gene programs of *Salmonella*. *Journal of Biological Chemistry* **281**: 30112-30121.
101. Troxell, B., M. L. Sikes, R. C. Fink, A. Vazquez-Torres, J. Jones-Carson *et al.* 2011 Fur negatively regulates *hns* and is required for the expression of *hilA* and virulence in *Salmonella enterica* serovar Typhimurium. *J. Bacteriol.* **193**: 497-505.
102. Van, I. F., V. Eeckhaut, F. Boyen, F. Pasmans, F. Haesebrouck *et al.* 2008 Mutations influencing expression of the *Salmonella enterica* serovar Enteritidis pathogenicity island I key regulator *hilA*. *Antonie Van Leeuwenhoek* **94**: 455-461.
103. Virlogeux-Payant, I., S. Baucheron, J. Pelet, J. Trotureau, E. Bottreau *et al.* 2008 TolC, but not AcrB, is involved in the invasiveness of multidrug-resistant *Salmonella enterica* serovar Typhimurium by increasing type III secretion system-1 expression. *Int.J.Med.Microbiol.* **298**: 561-569.
104. Wang, Q., J. G. Frye, M. McClelland, and R. M. Harshey, 2004 Gene expression patterns during swarming in *Salmonella typhimurium*: genes specific to surface growth and putative new motility and pathogenicity genes. *Mol.Microbiol.* **52**: 169-187.
105. Wang, Q., A. Suzuki, S. Mariconda, S. Porwollik, and R. M. Harshey, 2005 Sensing wetness: a new role for the bacterial flagellum. *EMBO J.* **24**: 2034-2042.
106. Wang, R. F., and S. R. Kushner, 1991 Construction of versatile low-copy-number vectors for cloning, sequencing and gene expression in *Escherichia coli*. *Gene* **100**: 195-199.
107. Webber, M. A., A. M. Bailey, J. M. Blair, E. Morgan, M. P. Stevens *et al.* 2009 The global consequence of disruption of the AcrAB-TolC efflux pump in *Salmonella enterica* includes reduced expression of SPI-1 and other attributes required to infect the host. *J. Bacteriol.* **191**: 4276-4285.
108. Weir, E. K., L. C. Martin, C. Poppe, B. K. Coombes, and P. Boerlin, 2008 Subinhibitory concentrations of tetracycline affect virulence gene expression in a multi-resistant *Salmonella enterica* subsp. *enterica* serovar Typhimurium DT104. *Microbes.Infect.* **10**: 901-907.
109. Wilson, J. W., R. Ramamurthy, S. Porwollik, M. McClelland, T. Hammond *et al.* 2002 Microarray analysis identifies *Salmonella* genes belonging to the low-shear modeled microgravity regulon. *Proc.Natl.Acad.Sci.U.S.A* **99**: 13807-13812.
110. Wilson, R. L., S. J. Libby, A. M. Freet, J. D. Boddicker, T. F. Fahlen *et al.* 2001 Fis, a DNA nucleoid-associated protein, is involved in *Salmonella typhimurium* SPI-1 invasion gene expression. *Mol Microbiol* **39**: 79-88.
111. Zwir, I., D. Shin, A. Kato, K. Nishino, T. Latifi *et al.* 2005 Dissecting the PhoP regulatory network of *Escherichia coli* and *Salmonella enterica*. *Proc.Natl.Acad.Sci.U.S.A* **102**: 2862-2867.
