# Supplementary material
Source: PubMed Central journal article supplement (PMC3249375)
Supplement: supp_111.132779_FigureS1.pdf [file supp_111.132779_FigureS1.pdf]

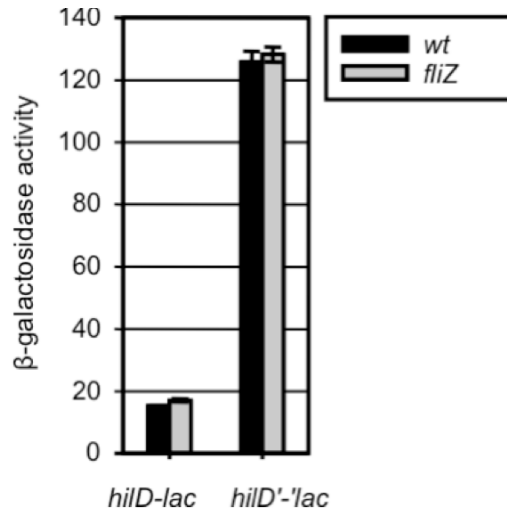

**Figure S1** Class I, FlizZ has no effect on HilD transcription or translation. For the equivalent of panels A and B (for example in Fig. S2) see FIGURE 3 in our previous publication (Chubiz et al., 2010). The panel above (equivalent to panel C in FIGURE S2) shows the  $\beta$ -galactosidase activity in strains containing a *hilD-lac* transcriptional or a *hilD'-lac* translational fusion and the indicated mutations after growth under SPI1 inducing conditions.  $\beta$ -galactosidase activity units are defined as ( $\mu\text{mol}$  of ONP formed  $\text{min}^{-1}$ )  $\times 10^3 / (\text{OD}_{600} \times \text{ml}$  of cell suspension) and are reported as mean  $\pm$  standard deviation where  $n=4$ .
