# Supplementary material
Source: PubMed Central journal article supplement (PMC3249375)
Supplement: supp_111.132779_FigureS2.pdf [file supp_111.132779_FigureS2.pdf]

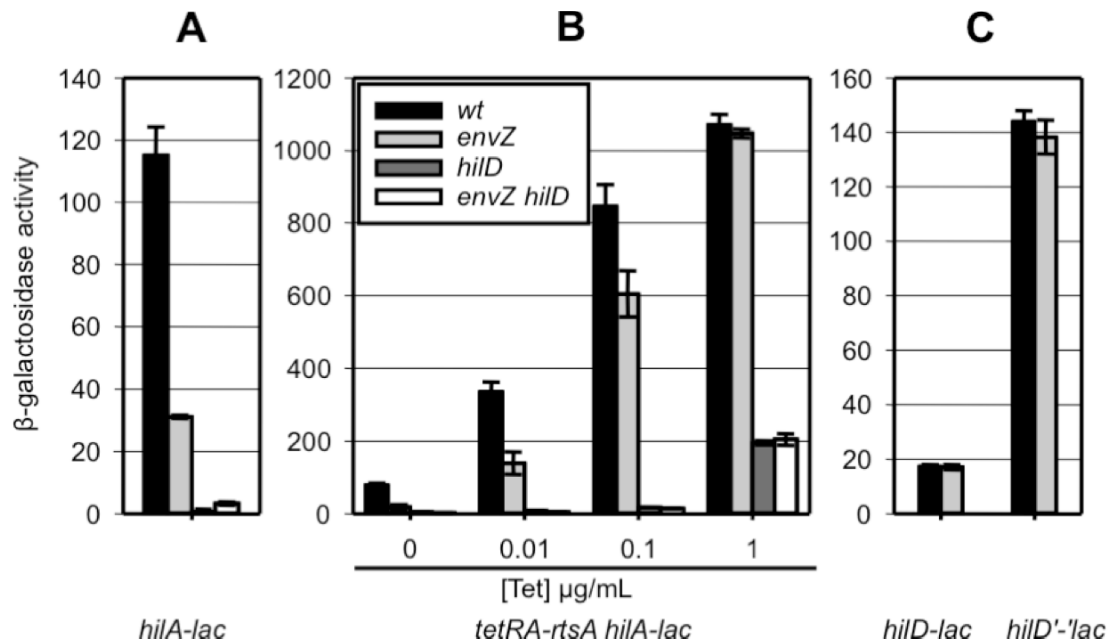

**Figure S2** Class I, EnvZ activates *hilA* expression via post-translational control of HilD. (A)  $\beta$ -galactosidase activity in strains containing a *hilA-lac* transcriptional fusion and the indicated mutations after growth under SPI1 inducing conditions. (B)  $\beta$ -galactosidase activity of strains containing a *hilA-lac* transcriptional fusion and indicated mutations with *rtsA* under the control of a tetracycline regulated promoter. Strains were grown under SPI1-inducing conditions with the indicated tetracycline concentrations. (C)  $\beta$ -galactosidase activity in strains containing a *hilD-lac* transcriptional or a *hilD'-lac* translational fusion and the indicated mutations after growth under SPI1 inducing conditions.  $\beta$ -galactosidase activity units are defined as  $(\mu\text{mol of ONP formed min}^{-1}) \times 10^3 / (\text{OD}_{600} \times \text{ml of cell suspension})$  and are reported as mean  $\pm$  standard deviation where  $n=4$ .
