# Supplementary material
Source: PubMed Central journal article supplement (PMC3249375)
Supplement: supp_111.132779_FigureS3.pdf [file supp_111.132779_FigureS3.pdf]

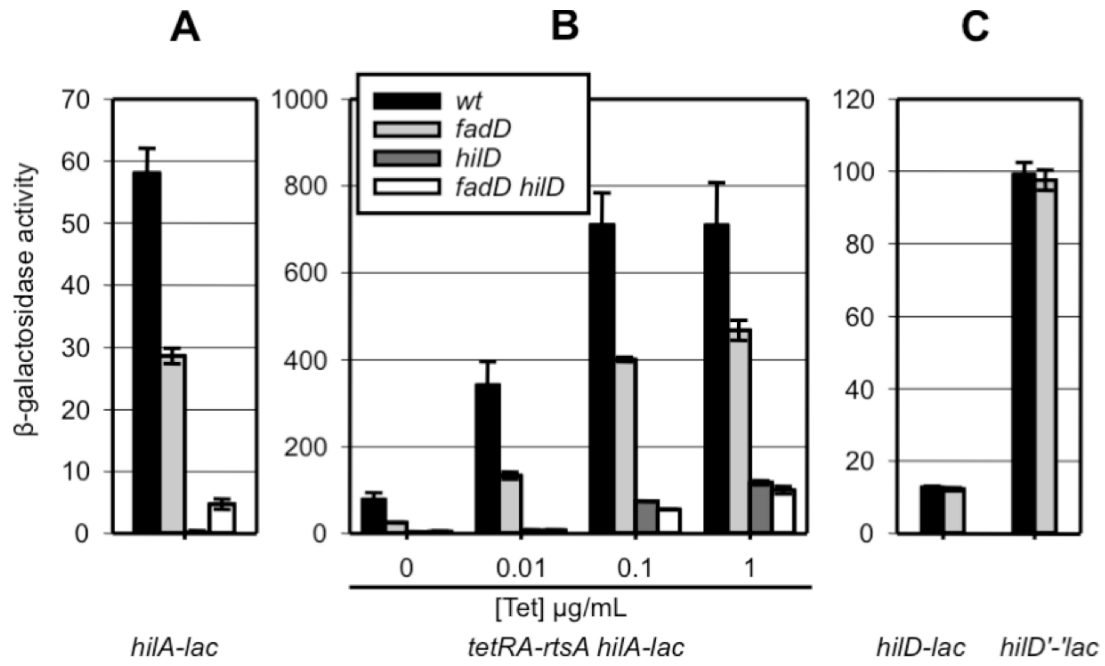

**Figure S3** Class I, FadD activates *hilA* expression via the post-translational control of HiID. See FIGURE S2 legend for details.
