# Supplementary material
Source: PubMed Central journal article supplement (PMC3249375)
Supplement: supp_111.132779_FigureS4.pdf [file supp_111.132779_FigureS4.pdf]

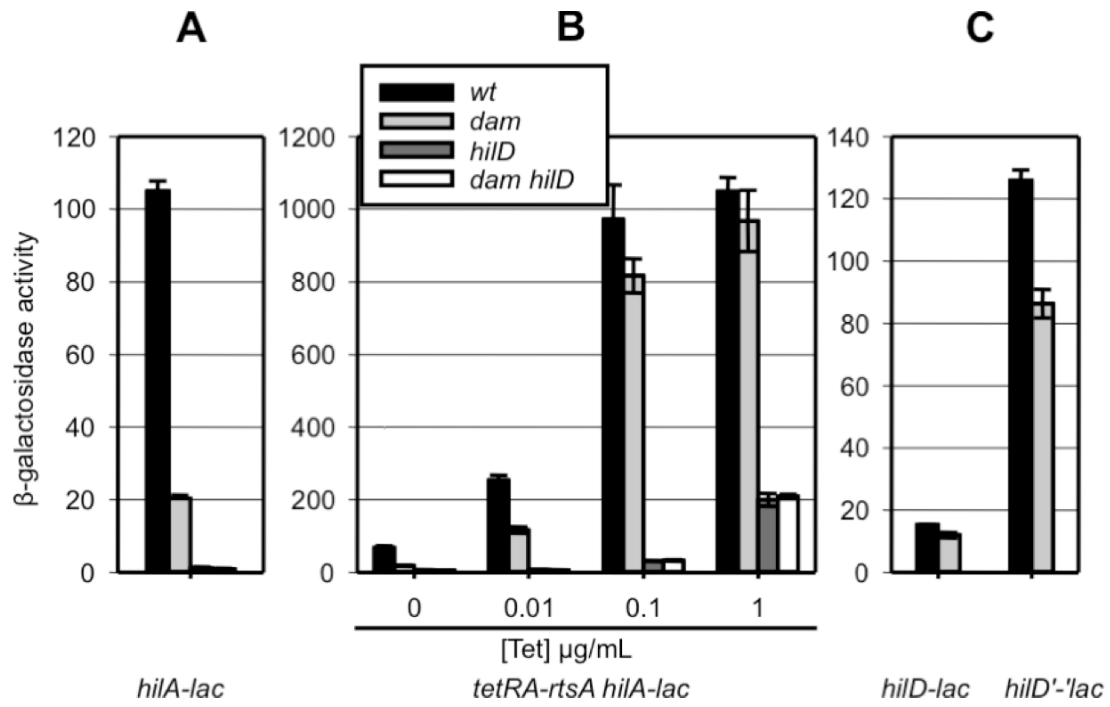

**Figure S4** Class II, Dam activates *hilA* expression via the post-transcriptional control of *hilD*. See FIGURE S2 legend for details.
