# Supplementary material
Source: PubMed Central journal article supplement (PMC3249375)
Supplement: supp_111.132779_FigureS5.pdf [file supp_111.132779_FigureS5.pdf]

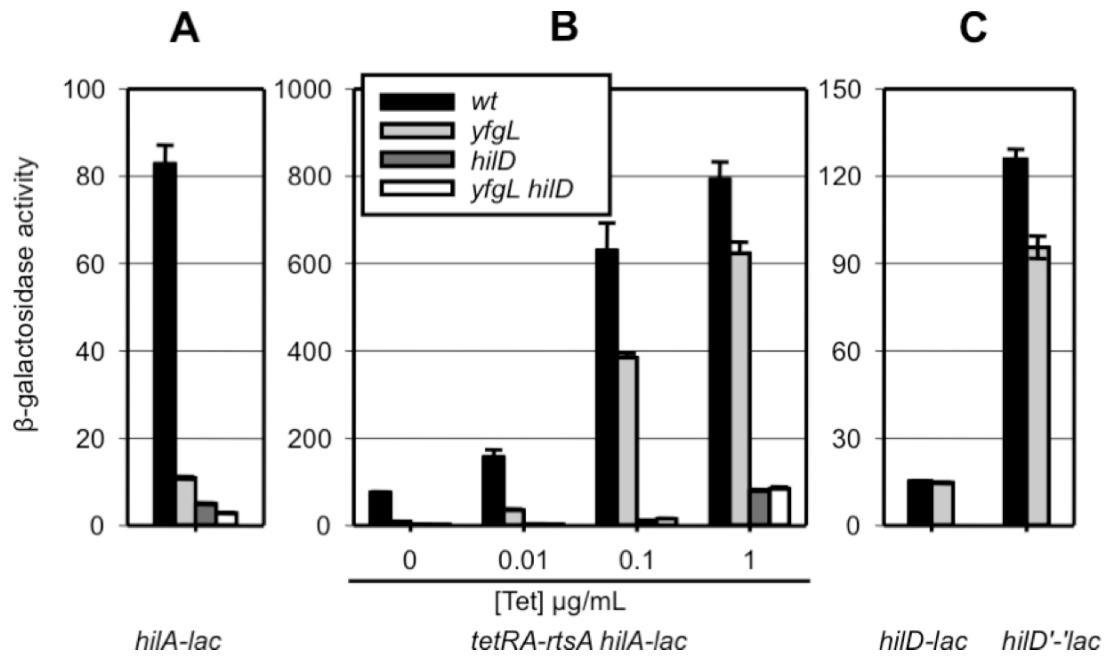

**Figure S5** Class II, YfgL activates *hiA* expression via the post-transcriptional control of *hiD*. See FIGURE S2 legend for details.
