# Supplementary material
Source: PubMed Central journal article supplement (PMC3249375)
Supplement: supp_111.132779_FigureS7.pdf [file supp_111.132779_FigureS7.pdf]

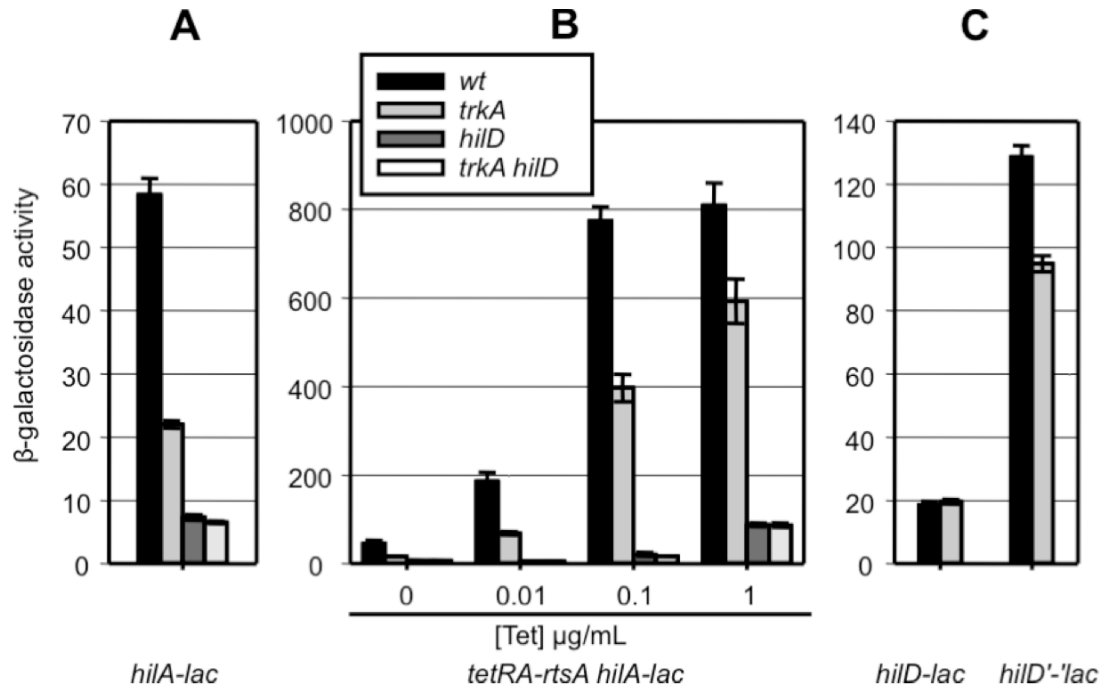

**Figure S7** Class II, TrkA activates *hilA* expression via the post-transcriptional control of *hilD*. See FIGURE S2 legend for details.
