# Supplementary material
Source: PubMed Central journal article supplement (PMC3249375)
Supplement: supp_111.132779_FigureS9.pdf [file supp_111.132779_FigureS9.pdf]

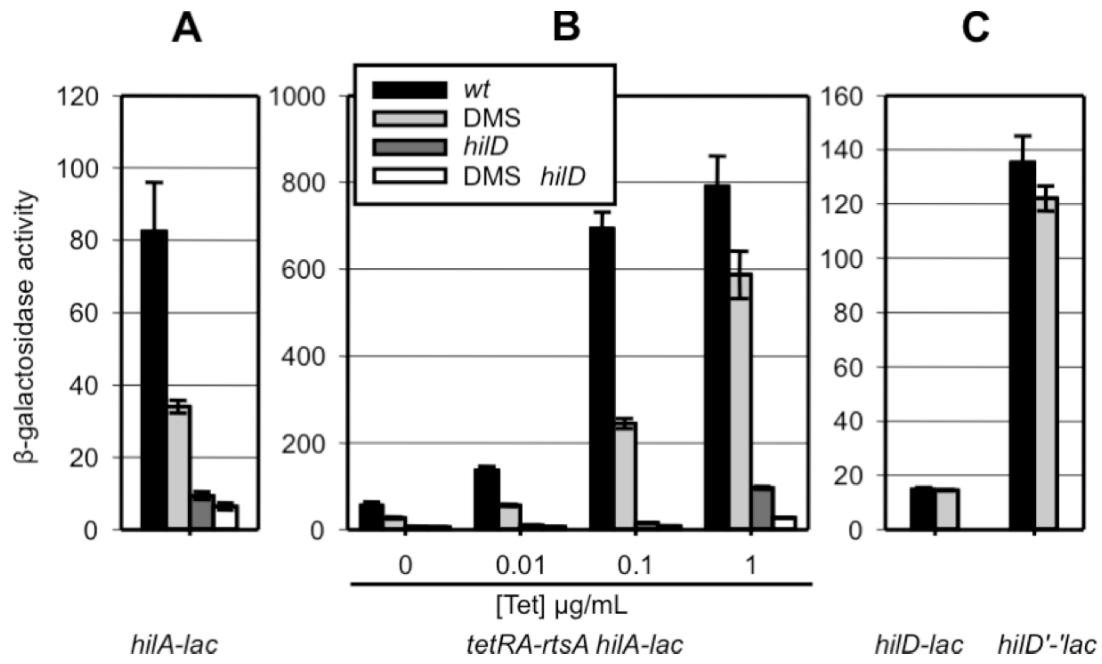

**Figure S9** Class III, Dimethyl sulfide (DMS) represses *hilA* expression independently of HilD. See FIGURE S2 legend for details.
