# Supplementary material
Source: PubMed Central journal article supplement (PMC3249375)
Supplement: supp_111.132779_FigureS10.pdf [file supp_111.132779_FigureS10.pdf]

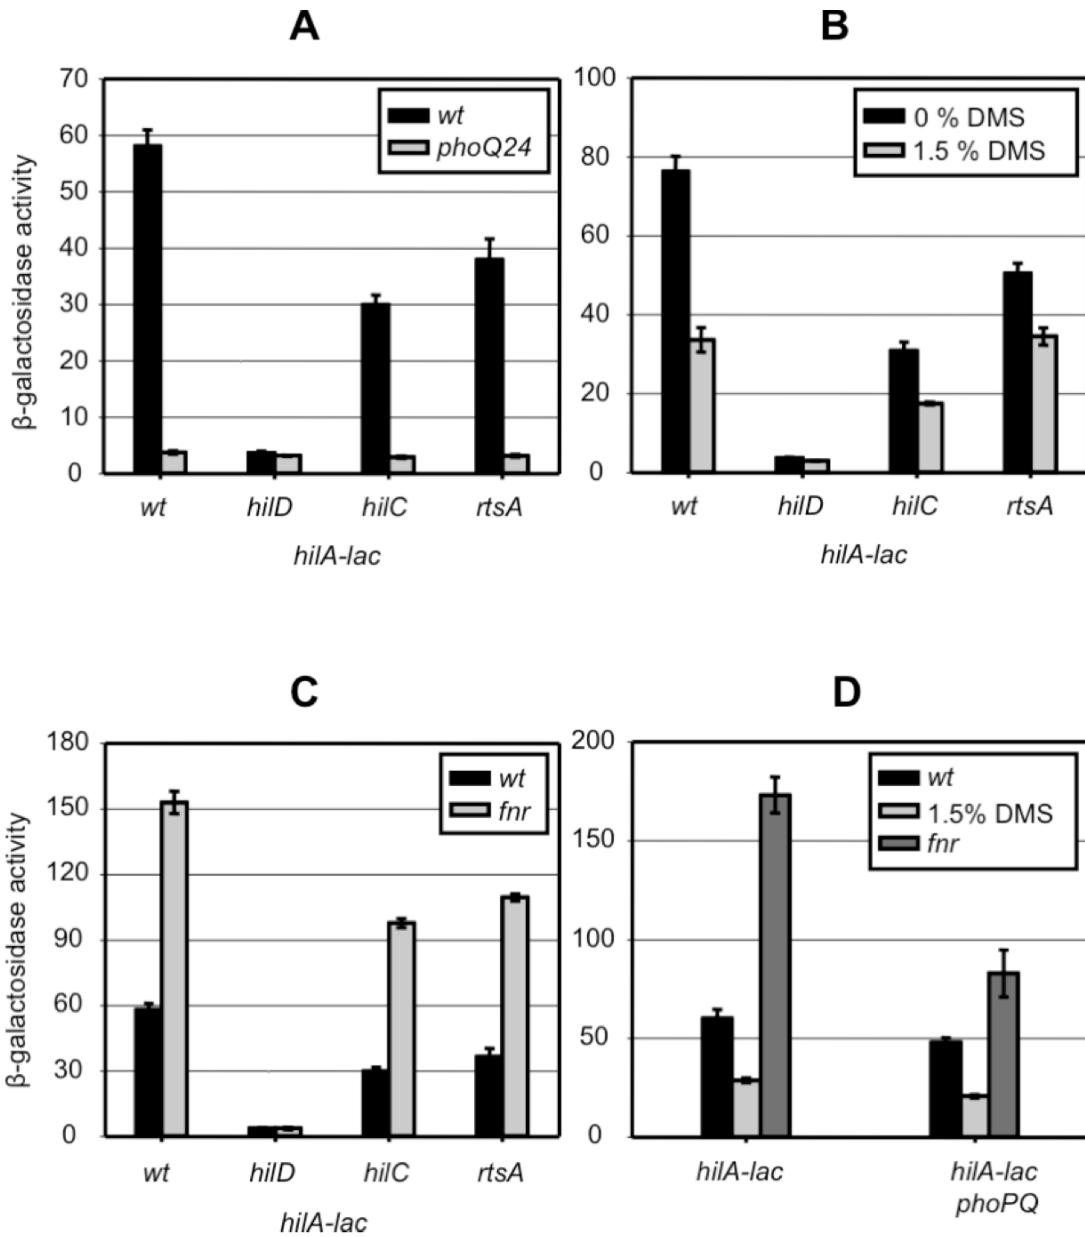

**Figure S10** A) PhoPQ, (B) dimethyl sulfide (DMS), and (C) Fnr repress *hilA* expression independently of HilC and RtsA. (D) Dimethyl sulfide (DMS) and Fnr repress *hilA* expression independently of PhoPQ.  $\beta$ -galactosidase activity in strains containing a *hilA-lac* transcriptional fusion and the indicated mutations, or in the presence or absence of the 1.5% dimethyl sulfide, after growth under SPI1 inducing conditions.  $\beta$ -galactosidase activity units are defined as  $(\mu\text{mol of ONP formed min}^{-1}) \times 10^3 / (\text{OD}_{600} \times \text{ml of cell suspension})$  and are reported as mean  $\pm$  standard deviation where  $n=4$ .
