# Supplementary material
Source: PubMed Central journal article supplement (PMC3249375)
Supplement: supp_111.132779_FigureS11.pdf [file supp_111.132779_FigureS11.pdf]

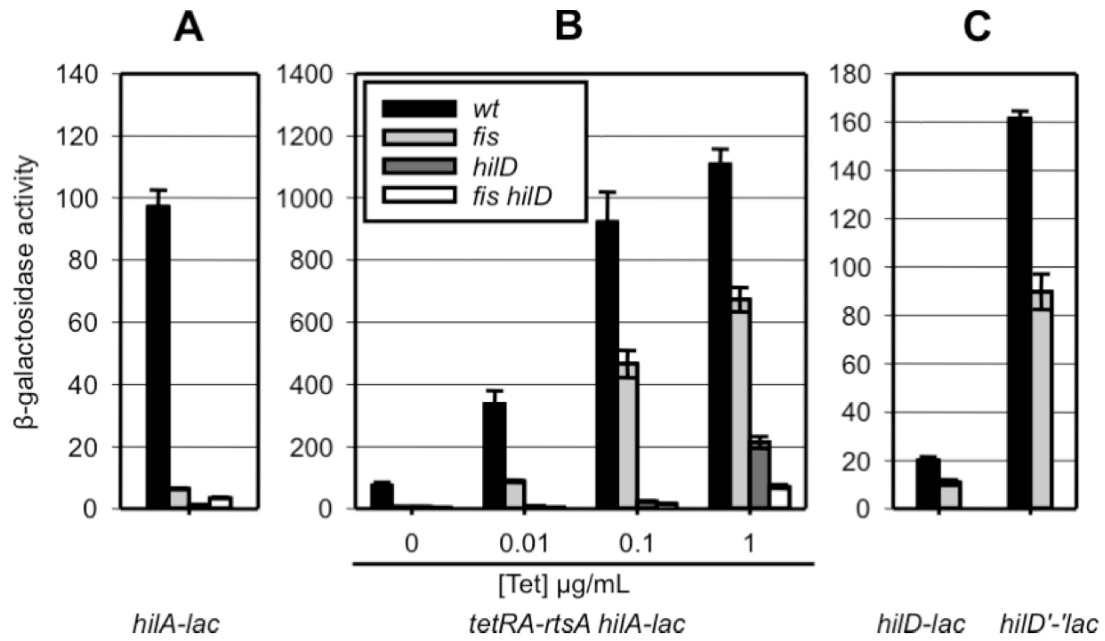

**Figure S11** Class IV, Fis activates SPI 1 expression independently of HlID (affect all promoters in the feed-forward loop). See FIGURE S2 legend for details.
