# Supplementary material
Source: PubMed Central journal article supplement (PMC3249375)
Supplement: supp_111.132779_FigureS12.pdf [file supp_111.132779_FigureS12.pdf]

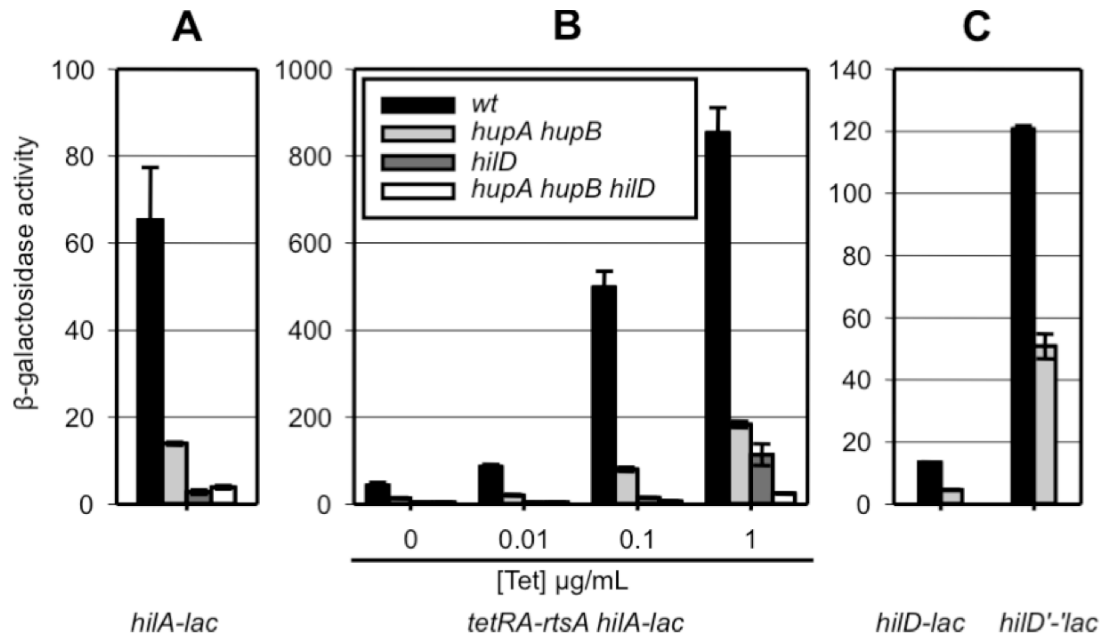

**Figure S12** Class IV, HU (encoded by *hupA hupB*) activates SPI 1 expression independently of HIL D (affect all promoters in the feed-forward loop). See FIGURE S2 legend for details.
