# Supplementary material
Source: PubMed Central journal article supplement (PMC3249375)
Supplement: supp_111.132779_FigureS14.pdf [file supp_111.132779_FigureS14.pdf]

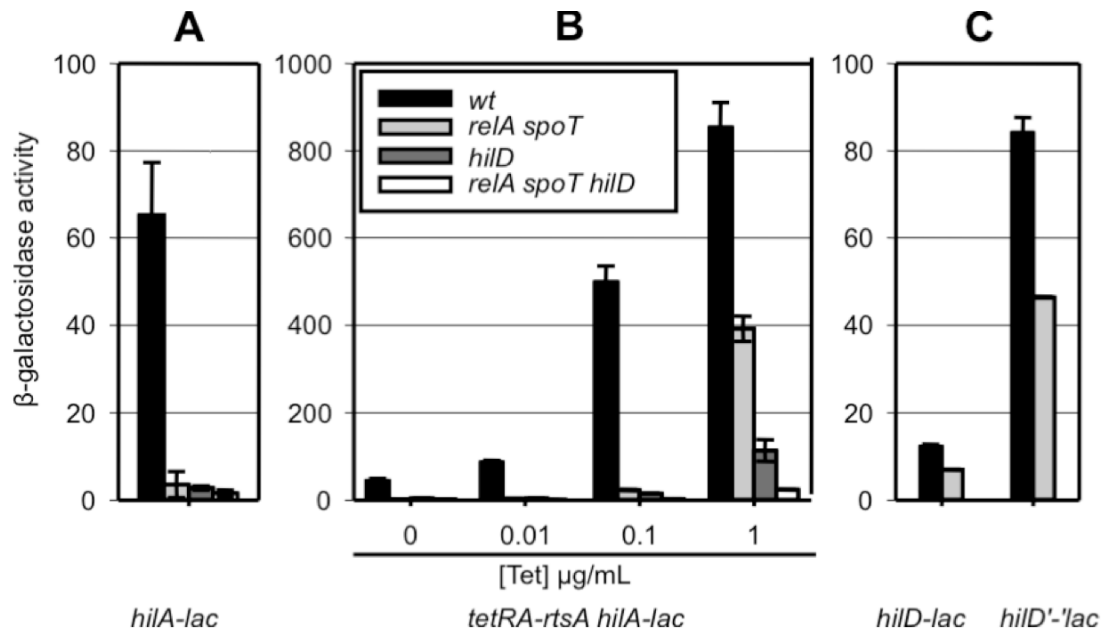

**Figure S14** Class IV, ppGpp (produced by RelA and SpoT) activates SPI 1 expression independently of HilD (affect all promoters in the feed-forward loop). See FIGURE S2 legend for details.
