# Supplementary material
Source: PubMed Central journal article supplement (PMC3249375)
Supplement: supp_111.132779_FigureS15.pdf [file supp_111.132779_FigureS15.pdf]

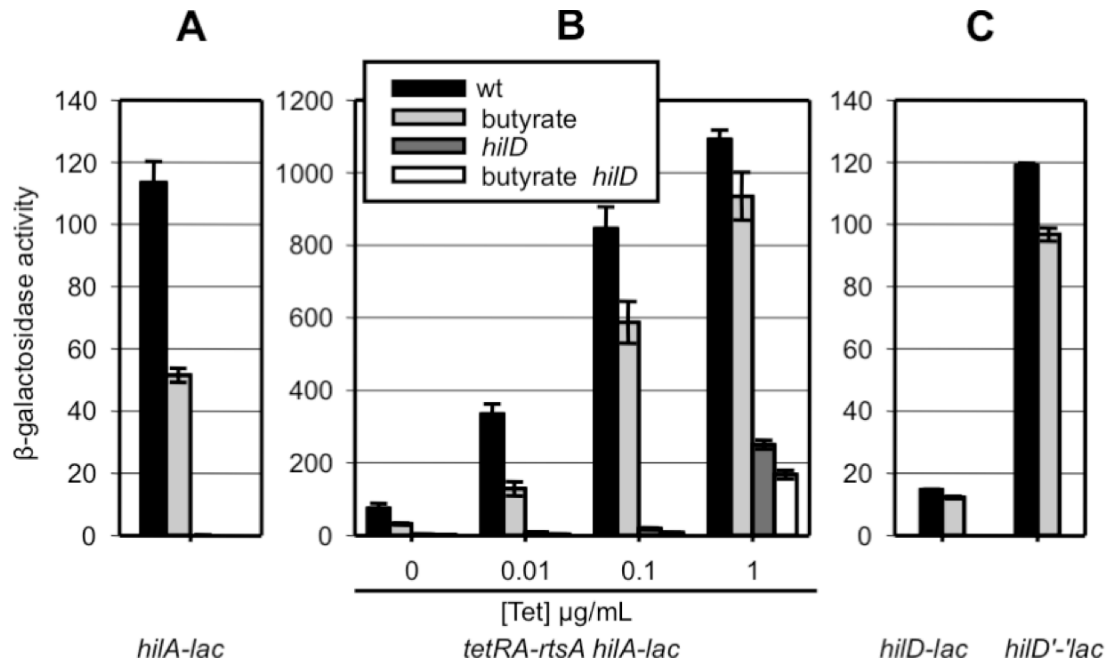

**Figure S15** Class IV, Butyrate represses SPI1 expression independently of HiID (affect all promoters in the feed-forward loop). See FIGURE S2 legend for details.
