# Supplementary material
Source: PubMed Central journal article supplement (PMC3249375)
Supplement: supp_111.132779_FigureS17.pdf [file supp_111.132779_FigureS17.pdf]

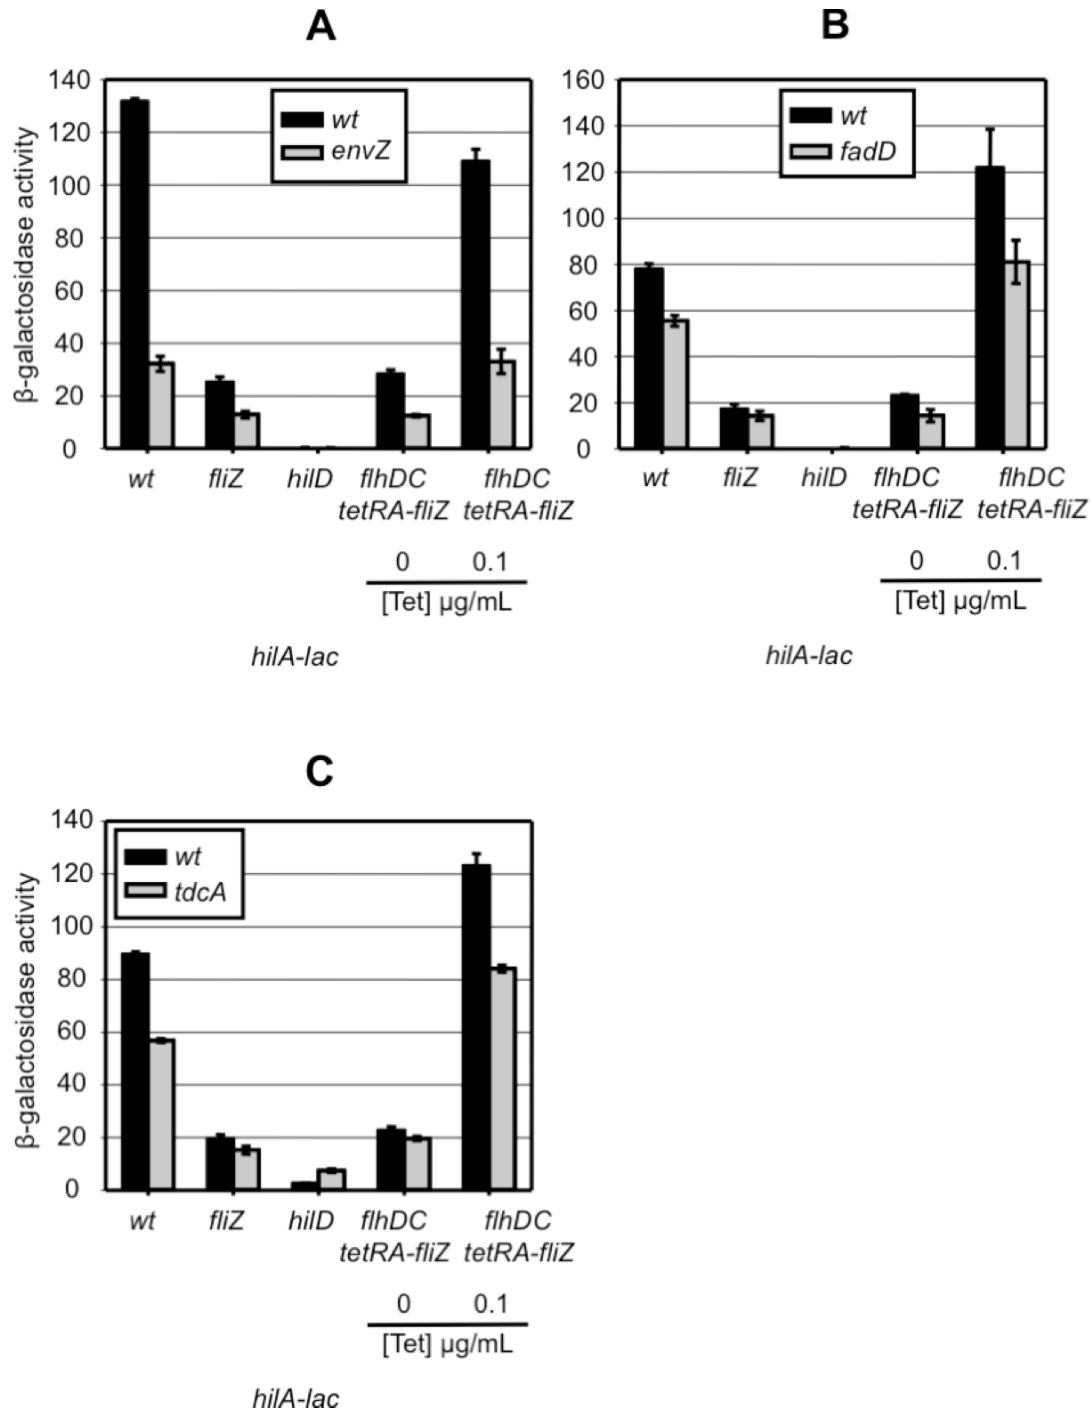

**Figure S17** A) EnvZ, (B) FadD, and (C) TdcA affect *hilA* expression independently of *FliZ*.  $\beta$ -galactosidase activity in strains containing a *hilA-lac* transcriptional fusion and the indicated mutations after growth under SPI1 inducing conditions.  $\beta$ -galactosidase activity units are defined as  $(\mu\text{mol of ONP formed min}^{-1}) \times 10^3 / (\text{OD600} \times \text{ml of cell suspension})$  and are reported as mean  $\pm$  standard deviation where  $n=4$ .
