# Supplementary material
Source: PubMed Central journal article supplement (PMC3249375)
Supplement: supp_111.132779_TableS1.pdf [file supp_111.132779_TableS1.pdf]

**TABLE S1 Regulatory factors/conditions affecting expression of SPI1**

| <b>Regulator</b> | <b>Description</b>                                                                                                                                     | <b>Mechanism of action/comments</b>                                                                  | <b>References</b>                                         |
|------------------|--------------------------------------------------------------------------------------------------------------------------------------------------------|------------------------------------------------------------------------------------------------------|-----------------------------------------------------------|
| HilA             | Transcriptional activator, OmpR/ToxR family                                                                                                            | Direct activation of <i>prg/org</i> and <i>inv/spa</i> operons                                       | (8; 23; 27; 56; 57)                                       |
| HilD             | AraC-like transcriptional activator                                                                                                                    | Direct activation of <i>hilA</i> , <i>hilD</i> , <i>hilC</i> , and <i>rtsA</i>                       | (29; 88)                                                  |
| HilC             | AraC-like transcriptional activator                                                                                                                    | Direct activation of <i>hilA</i> , <i>hilD</i> , <i>hilC</i> , and <i>rtsA</i>                       | (28; 29; 46; 88)                                          |
| RtsA             | AraC-like transcriptional activator                                                                                                                    | Direct activation of <i>hilA</i> , <i>hilD</i> , <i>hilC</i> , and <i>rtsA</i>                       | (29; 30)                                                  |
| HilE             |                                                                                                                                                        | Repression of <i>hilA</i> by binding to and preventing HilD function                                 | (11); Chubiz JE (unpublished)                             |
| FlhZ             | Enhancer of class II flagellar genes expression                                                                                                        | Activation of <i>hilA</i> via post-translational regulation of HilD                                  | (20; 45; 54; 59; 85; 102)                                 |
| EnvZ/OmpR        | Two-component regulatory system; regulation of outer membrane porin genes, and virulence                                                               | Activation of <i>hilA</i> via HilD                                                                   | (29; 58)                                                  |
| FadD             | Acyl-CoA synthetase; degradation of long-chain fatty acids                                                                                             | Activation of <i>hilA</i> via an unknown mechanism                                                   | (59); Ellermeier JR (unpublished)                         |
| SirA             | Transcriptional regulator; two-component regulatory system BarA/SirA; regulation of carbohydrate metabolism, motility, biofilm formation, and invasion | Activation of <i>hilA</i> via activation of <i>csrB/csrC</i> to block CsrA repression of <i>hilD</i> | (1; 29; 46; 52; 62; 99; 102); Ellermeier JR (unpublished) |
| Dam              | DNA methylase                                                                                                                                          | Activation of <i>hilA</i> via post-transcriptional regulation of <i>hilD</i>                         | (55)                                                      |
| Ack Pta          | acetate kinase and phosphotransacetylase                                                                                                               | Activation of <i>hilA</i> and <i>hilD</i> by formate via an unknown mechanism                        | (43)                                                      |

**TABLE S1 Regulatory factors/conditions affecting expression of SPI1**

| <b>Regulator</b> | <b>Description</b>                                                                                                       | <b>Mechanism of action/comments</b>                                                                                            | <b>References</b>                                 |
|------------------|--------------------------------------------------------------------------------------------------------------------------|--------------------------------------------------------------------------------------------------------------------------------|---------------------------------------------------|
| YfgL             | Outer membrane lipoprotein; assembly of the outer membrane $\beta$ -barrel proteins in complex with YaeT, YfiO, and NlpB | Activation of SPI1 genes via an unknown mechanism                                                                              | (2; 37)                                           |
| Trk (potassium)  | Potassium transporter                                                                                                    | Activation of SPI1 genes via an unknown mechanism                                                                              | (94)                                              |
| Fnr              | Transcriptional regulator; cytoplasmic oxygen sensor                                                                     | Repression of <i>hilA</i> via an unknown mechanism                                                                             | (102); Ellermeier JR (unpublished)                |
| PhoPQ (PhoQ24)   | Two-component regulatory system; response to divalent cation limitation, pH and antimicrobial peptides                   | Repression of <i>hilA</i> , most likely direct                                                                                 | (9; 10; 14; 78; 111); Ellermeier JR (unpublished) |
| H-NS             | Nucleoid protein                                                                                                         | Direct repression of <i>hilA</i> , <i>hilC</i> , <i>hilD</i> and <i>rtsA</i>                                                   | (73; 74; 89)                                      |
| Hha              | Nucleoid protein                                                                                                         | Direct repression of <i>hilA</i> , <i>hilC</i> , <i>hilD</i> and <i>rtsA</i>                                                   | (36; 73; 74; 102)                                 |
| Fis              | Nucleoid protein                                                                                                         | Activation of SPI1 genes                                                                                                       | (22; 48; 89; 110)}                                |
| HU               | Nucleoid protein                                                                                                         | Activation of SPI1 genes                                                                                                       | (60; 89)                                          |
| RfaH             | Transcriptional anti-terminator; long operons for LPS core and O-antigen biosynthesis                                    | Activation of SPI1 genes via an unknown mechanism                                                                              | (60; 67)                                          |
| Fur              | Transcriptional regulator; response to iron                                                                              | Activation of <i>hilA</i> via an unknown regulation of HilD; repression of H-NS; direct binding of Fur to <i>hilD</i> promoter | (32; 98; 101)                                     |
| TdcA             | Transcriptional regulator of <i>tdc</i> operon; transport and metabolism of L-                                           | Activation of <i>fliZ</i> and SPI1 genes expression                                                                            | (50)                                              |

**TABLE S1 Regulatory factors/conditions affecting expression of SPI1**

| Regulator              | Description                                                                                                                                                                | Mechanism of action/comments                                                                                 | References                                    |
|------------------------|----------------------------------------------------------------------------------------------------------------------------------------------------------------------------|--------------------------------------------------------------------------------------------------------------|-----------------------------------------------|
|                        | threonine and L-serine                                                                                                                                                     |                                                                                                              |                                               |
| FhDC                   | Transcriptional regulator; activation of class II flagellar genes                                                                                                          | Activation of <i>hilA</i> via activation of <i>fliZ</i>                                                      | (20; 54)                                      |
| DsbA                   | Periplasmic disulfide bond oxidase                                                                                                                                         | Activation of <i>hilA</i> via activation of <i>FliZ</i> , including repression of <i>RcsCDB</i>              | (31; 54)                                      |
| RcsCDB                 | phosphorelay system: sensor <i>RcsC</i> , response regulator <i>RcsB</i> , and phosphotransfer protein <i>RcsD</i> ; regulation of capsule synthesis and biofilm formation | Repression of <i>hilA</i> via repression of <i>FliZ</i> and an independent unknown regulation of <i>HilD</i> | (54)                                          |
| Lon                    | ATP-dependent protease                                                                                                                                                     | Repression of <i>hilA</i> via degradation of <i>HilD</i> , <i>HilC</i> , and <i>FliZ</i>                     | (16; 20; 95; 97)                              |
| ClpXP                  | ATP-dependent protease                                                                                                                                                     | Repression of SPI1 genes via <i>FliZ</i>                                                                     | (47)                                          |
| Formate                | Short chain fatty acid                                                                                                                                                     | Activation of <i>hilA</i> and <i>hilD</i> ( see Ack Pta)                                                     | (43)                                          |
| Dimethyl sulfide/ DMSO |                                                                                                                                                                            | Repression of SPI1 genes via an unknown mechanism                                                            | (4)                                           |
| Temperature            |                                                                                                                                                                            | Activation of SPI1 genes when shifted from 25° to 37°C in H-NS-dependent manner                              | (75)                                          |
| Butyrate               | Short chain fatty acid                                                                                                                                                     | Repression of SPI1 genes via an unknown mechanism                                                            | (41)                                          |
| ppGpp                  | Small signaling molecule; stringent response during starvation                                                                                                             | Activation of <i>hilA</i> via an unknown mechanism                                                           | (79; 92; 93; 100);Ellermeier JR (unpublished) |

**TABLE S1 Regulatory factors/conditions affecting expression of SPI1**

| <b>Regulator</b> | <b>Description</b>                                                                                                       | <b>Mechanism of action/comments</b>                                                | <b>References</b> |
|------------------|--------------------------------------------------------------------------------------------------------------------------|------------------------------------------------------------------------------------|-------------------|
| FimZY            | Transcriptional regulators; control of type 1 fimbriae gene expression                                                   | Repression of <i>hilA</i> via activation of <i>hilE</i>                            | (12; 87)          |
| FimW             | negative regulator of type 1 fimbriae                                                                                    | Activation of SPI1 genes via an unknown mechanism                                  | (38)              |
| Mlc              | Transcriptional regulator; regulation of sugar uptake and metabolism                                                     | Repression of <i>hilA</i> via activation of <i>hilE</i>                            | (53)              |
| CRP              | cAMP-receptor protein                                                                                                    | Activation of invasion via an unknown mechanism                                    | (17)              |
| CpxA             | Sensor kinase, two-component regulatory system CpxRA; periplasmic stress response                                        | Activation of <i>hilA</i> via an unknown mechanism, apparently independent of CpxR | (68)              |
| Lrp              | Transcriptional regulator                                                                                                | Overproduction of Lrp represses SPI1 genes via an unknown mechanism                | (6)               |
| PmrM             | Part of the <i>pmrHFIJKLM</i> operon                                                                                     | Activation of <i>hilA</i> via an unknown mechanism                                 | (61; 65; 102)     |
| ApaH/YgdP        | Dinucleoside polyphosphate hydrolases                                                                                    | Activation of invasion via an unknown mechanism                                    | (44)              |
| PreAB (QseBC)    | Two-component regulatory system; regulation of motility and virulence in response to quorum-sensing and hormonal signals | Activation of SPI1 genes via an unknown mechanism                                  | (64; 66)          |
| LuxS             | Autoinducer 2 synthase                                                                                                   | Activation of <i>invF</i>                                                          | (19)              |
| PhoBR            | Two-component regulatory system; phosphate limitation                                                                    | Repression of <i>hilA</i> via PhoBR                                                | (59)              |

**TABLE S1 Regulatory factors/conditions affecting expression of SPI1**

| <b>Regulator</b> | <b>Description</b>                                                             | <b>Mechanism of action/comments</b>                                   | <b>References</b> |
|------------------|--------------------------------------------------------------------------------|-----------------------------------------------------------------------|-------------------|
| SprB             | Transcriptional regulator                                                      | Repression of <i>hilA</i> via repression of <i>hilD</i> transcription | (86)              |
| RamA             | AraC/XylS family transcriptional activator; regulation of multidrug resistance | Repression of SPI1 genes via an unknown mechanism                     | (7)               |
| PPK              | Polyphosphate kinase                                                           | Activation of invasion via an unknown mechanism                       | (49)              |
| PNPase           | Polynucleotide phosphorylase                                                   | Repression of SPI1 genes via an unknown mechanism                     | (21)              |
| Hfq              | RNA shaperone                                                                  | Activation of SPI1 genes                                              | (3; 90; 91)       |
| SmpB             | RNA-binding protein                                                            | Activation of SPI1 genes                                              | (3)               |
| IHF              | Nucleoid protein                                                               | Activation of <i>hilA</i> ; counteraction of H-NS mediated silencing  | (35; 83)          |
| RNAseE           | 5'-end-dependent endoribonuclease; part of degradosome complex                 | Repression of SPI1 genes; exact mechanism unclear                     | (35)              |
| Pag              |                                                                                | Repression of SPI1 genes via an unknown mechanism                     | (35)              |
| SirB             |                                                                                | Activation of <i>hilA</i> ; exact mechanism unclear                   | (84)              |
| Sig32            | Sigma factor; heat shock response                                              | Repression of <i>hilA</i> via degradation of HilD by Lon protease     | (63)              |
| TolC/AcrAB       | Multidrug efflux pump                                                          | Activation of SPI1 genes via an unknown mechanism                     | (15; 103; 107)    |
| AsmA             | Outer membrane protein                                                         | Required for invasion; unknown mechanism                              | (80)              |
| CorA             | Mg <sup>2+</sup> channel                                                       | Activation of SPI1 genes via an unknown mechanism                     | (76; 77)          |

**TABLE S1** Regulatory factors/conditions affecting expression of SPI1

| <b>Regulator</b>                      | <b>Description</b>                              | <b>Mechanism of action/comments</b>                | <b>References</b> |
|---------------------------------------|-------------------------------------------------|----------------------------------------------------|-------------------|
| PoxA                                  | paralog of lysyl tRNA-synthetase                | Repression of SPI1 genes via an unknown mechanism  | (70)              |
| YjeK                                  | putative 2,3- $\beta$ -lysine aminomutase       | Repression of SPI1 genes via an unknown mechanism  | (70)              |
| Antimicrobial peptides                |                                                 | Repression of SPI1 genes via PhoPQ                 | (5)               |
| Macrophages                           |                                                 | Repression of SPI1 genes                           | (33; 96)          |
| Epithelial cells                      |                                                 | Activation of SPI1 genes                           | (42)              |
| Bile                                  | Role in lipid digestion                         | Repression of <i>hilA</i> via SirA                 | (81; 82)          |
| Propanediol                           | Product of decomposition of rhamnose and fucose | Repression of <i>hilA</i> via an unknown mechanism | (69)              |
| Microgravity                          | low-shear modeled microgravity                  | Repression of SPI1 genes                           | (109)             |
| Lactobacillus supernatant; probiotics |                                                 | Repression of SPI1 genes via an unknown mechanism  | (25); (13)        |
| Tetracycline                          |                                                 | Activation of SPI1 genes                           | (108)             |
| Nalidixic acid                        |                                                 | Repression of SPI1 genes                           | (26)              |
| Salicylidene acylhydrazides           |                                                 | Repression of SPI1 genes                           | (71)              |
| Fluoroquinolone resistance            |                                                 | Repression of SPI1 genes                           | (34)              |
