# Supplementary material
Source: PubMed Central journal article supplement (PMC3249375)
Supplement: supp_111.132779_TableS2.pdf [file supp_111.132779_TableS2.pdf]

**TABLE S2 Strains and plasmids**

| Name   | Genotype <sup>a</sup>                                              | Deletion endpoints <sup>b</sup> | Source or reference <sup>c</sup> |
|--------|--------------------------------------------------------------------|---------------------------------|----------------------------------|
| 14028  | Wild type                                                          |                                 | ATCC <sup>d</sup>                |
| JS564  | <i>ΔhilD138::Kn</i>                                                |                                 | (32)                             |
| JS253  | <i>ΔhilD114::Cm</i>                                                |                                 | (30)                             |
| JS749  | <i>attλ::pDX1::hilA'-lacZ</i>                                      |                                 | (54)                             |
| JS951  | <i>ΔhilD138::Kn attλ::pDX1::hilA'-lacZ</i>                         |                                 | (20)                             |
| JS576  | <i>ΔhilD114::Cm attλ::pDX1::hilA'-lacZ</i>                         |                                 | (32)                             |
| JS953  | <i>tetRA-rtsA attλ::pDX1::hilA'-lacZ</i>                           |                                 | (20)                             |
| JS955  | <i>ΔhilD138::Kn tetRA-rtsA attλ::pDX1::hilA'-lacZ</i>              |                                 | (20)                             |
| JS488  | Φ( <i>hilD'-lac<sup>+</sup></i> )114                               |                                 |                                  |
| JS892  | Φ( <i>hilD'-lacZ</i> ) <i>hyb139</i>                               |                                 | (20)                             |
| JS996  | <i>ΔhilE115::Cm</i>                                                | 4763527-<br>4764108             |                                  |
| JS997  | <i>ΔhilE115::Cm attλ::pDX1::hilA'-lacZ</i>                         |                                 |                                  |
| JS998  | <i>ΔhilE115::Cm ΔhilD138::Kn attλ::pDX1::hilA'-lacZ</i>            |                                 |                                  |
| JS999  | <i>ΔhilE115::Cm tetRA-rtsA attλ::pDX1::hilA'-lacZ</i>              |                                 |                                  |
| JS1000 | <i>ΔhilE115::Cm ΔhilD138::Kn tetRA-rtsA attλ::pDX1::hilA'-lacZ</i> |                                 |                                  |
| JS1001 | Φ( <i>hilD'-lac<sup>+</sup></i> )114 <i>ΔhilE115::Cm</i>           |                                 |                                  |
| JS1002 | Φ( <i>hilD'-lacZ</i> ) <i>hyb139 ΔhilE115::Cm</i>                  |                                 |                                  |
| JS950  | <i>ΔfliZ8042::Cm attλ::pDX1::hilA'-lacZ</i>                        |                                 | (20)                             |
| JS1003 | Φ( <i>hilD'-lac<sup>+</sup></i> )114 <i>ΔfliZ8042::Cm</i>          |                                 |                                  |
| JS1004 | Φ( <i>hilD'-lacZ</i> ) <i>hyb139 ΔfliZ8042::Cm</i>                 |                                 |                                  |
| JS1006 | <i>ΔenvZ182::Cm attλ::pDX1::hilA'-lacZ</i>                         |                                 |                                  |
| JS1007 | <i>ΔenvZ182::Cm ΔhilD138::Kn attλ::pDX1::hilA'-lacZ</i>            |                                 |                                  |
| JS1008 | <i>ΔenvZ182::Cm tetRA-rtsA attλ::pDX1::hilA'-lacZ</i>              |                                 |                                  |
| JS1009 | <i>ΔenvZ182::Cm ΔhilD138::Kn tetRA-rtsA attλ::pDX1::hilA'-lacZ</i> |                                 |                                  |
| JS1010 | Φ( <i>hilD'-lac<sup>+</sup></i> )114 <i>ΔenvZ182::Cm</i>           |                                 |                                  |
| JS1011 | Φ( <i>hilD'-lacZ</i> ) <i>hyb139 ΔenvZ182::Cm</i>                  |                                 |                                  |
| JS1012 | <i>ΔfadD21::Kn</i>                                                 | 1915235-<br>1916908             |                                  |
| JS1013 | <i>ΔfadD21::Kn attλ::pDX1::hilA'-lacZ</i>                          |                                 |                                  |
| JS1014 | <i>ΔfadD21::Kn ΔhilD114::Cm attλ::pDX1::hilA'-lacZ</i>             |                                 |                                  |
| JS1015 | <i>ΔfadD21::Kn tetRA-rtsA attλ::pDX1::hilA'-lacZ</i>               |                                 |                                  |
| JS1016 | <i>ΔfadD21::Kn ΔhilD114::Cm tetRA-rtsA attλ::pDX1::hilA'-lacZ</i>  |                                 |                                  |
| JS1017 | Φ( <i>hilD'-lac<sup>+</sup></i> )114 <i>ΔfadD21</i>                |                                 |                                  |
| JS1018 | Φ( <i>hilD'-lacZ</i> ) <i>hyb139 ΔfadD21</i>                       |                                 |                                  |
| JS1019 | <i>sirA3::Cm attλ::pDX1::hilA'-lacZ</i>                            |                                 |                                  |

| Name   | Genotype <sup>a</sup>                                                    | Deletion endpoints <sup>b</sup> | Source or reference <sup>c</sup> |
|--------|--------------------------------------------------------------------------|---------------------------------|----------------------------------|
| JS1020 | <i>sirA3::Cm ΔhilD138::Kn attλ::pDX1::hilA'-lacZ</i>                     |                                 |                                  |
| JS1021 | <i>sirA3::Cm tetRA-rtxA attλ::pDX1::hilA'-lacZ</i>                       |                                 |                                  |
| JS1022 | <i>sirA3::Cm ΔhilD138::Kn tetRA-rtxA attλ::pDX1::hilA'-lacZ</i>          |                                 |                                  |
| JS1023 | Φ( <i>hilD'-lac<sup>+</sup></i> )114 <i>sirA3::Cm</i>                    |                                 |                                  |
| JS1024 | Φ( <i>hilD'-lacZ</i> ) <i>hybb139 sirA3::Cm</i>                          |                                 |                                  |
| JS1025 | <i>Δdam241::Cm</i>                                                       | 3638689-<br>3639527             |                                  |
| JS1026 | <i>Δdam241::Cm attλ::pDX1::hilA'-lacZ</i>                                |                                 |                                  |
| JS1027 | <i>Δdam241::Cm ΔhilD138::Kn attλ::pDX1::hilA'-lacZ</i>                   |                                 |                                  |
| JS1028 | <i>Δdam241::Cm tetRA-rtxA attλ::pDX1::hilA'-lacZ</i>                     |                                 |                                  |
| JS1029 | <i>Δdam241::Cm ΔhilD138::Kn tetRA-rtxA attλ::pDX1::hilA'-lacZ</i>        |                                 |                                  |
| JS1030 | Φ( <i>hilD'-lac<sup>+</sup></i> )114 <i>Δdam241::Cm</i>                  |                                 |                                  |
| JS1031 | Φ( <i>hilD'-lacZ</i> ) <i>hyb139 Δdam241::Cm</i>                         |                                 |                                  |
| JS1032 | <i>Δ(ack-pta)4202::Cm</i>                                                | 2447938-<br>2451363             |                                  |
| JS1033 | <i>Δ(ack-pta)4202::Cm attλ::pDX1::hilA'-lacZ</i>                         |                                 |                                  |
| JS1034 | <i>Δ(ack-pta)4202::Cm ΔhilD138::Kn attλ::pDX1::hilA'-lacZ</i>            |                                 |                                  |
| JS1035 | <i>Δ(ack-pta)4202::Cm tetRA-rtxA attλ::pDX1::hilA'-lacZ</i>              |                                 |                                  |
| JS1036 | <i>Δ(ack-pta)4202::Cm ΔhilD138::Kn tetRA-rtxA attλ::pDX1::hilA'-lacZ</i> |                                 |                                  |
| JS1037 | Φ( <i>hilD'-lac<sup>+</sup></i> )114 <i>Δ(ack-pta)4202::Cm</i>           |                                 |                                  |
| JS1038 | Φ( <i>hilD'-lacZ</i> ) <i>hyb139 Δ(ack-pta)4202::Cm</i>                  |                                 |                                  |
| JS1180 | <i>ΔtrkA::Cm</i>                                                         | 3579771-<br>3581196             |                                  |
| JS1181 | <i>Δ trkA::Cm attλ::pDX1::hilA'-lacZ</i>                                 |                                 |                                  |
| JS1182 | <i>Δ trkA::Cm ΔhilD138::Kn attλ::pDX1::hilA'-lacZ</i>                    |                                 |                                  |
| JS1183 | <i>Δ trkA::Cm tetRA-rtxA attλ::pDX1::hilA'-lacZ</i>                      |                                 |                                  |
| JS1184 | <i>Δ trkA::Cm ΔhilD138::Kn tetRA-rtxA attλ::pDX1::hilA'-lacZ</i>         |                                 |                                  |
| JS1185 | Φ( <i>hilD'-lac<sup>+</sup></i> )114 <i>ΔtrkA::Cm</i>                    |                                 |                                  |
| JS1186 | Φ( <i>hilD'-lacZ</i> ) <i>hyb139 ΔtrkA::Cm</i>                           |                                 |                                  |
| JS1039 | <i>ΔyfgL611::Cm</i>                                                      | 2653048-<br>2654226             |                                  |
| JS1040 | <i>ΔyfgL611::Cm attλ::pDX1::hilA'-lacZ</i>                               |                                 |                                  |
| JS1041 | <i>ΔyfgL611::Cm ΔhilD138::Kn attλ::pDX1::hilA'-lacZ</i>                  |                                 |                                  |
| JS1042 | <i>ΔyfgL611::Cm tetRA-rtxA attλ::pDX1::hilA'-lacZ</i>                    |                                 |                                  |
| JS1043 | <i>ΔyfgL611::Cm ΔhilD138::Kn tetRA-rtxA attλ::pDX1::hilA'-lacZ</i>       |                                 |                                  |
| JS1044 | Φ( <i>hilD'-lac<sup>+</sup></i> )114 <i>ΔyfgL611::Cm</i>                 |                                 |                                  |
| JS1045 | Φ( <i>hilD'-lacZ</i> ) <i>hyb139 ΔyfgL611::Cm</i>                        |                                 |                                  |

| Name   | Genotype <sup>a</sup>                                                     | Deletion endpoints <sup>b</sup> | Source or reference <sup>c</sup> |
|--------|---------------------------------------------------------------------------|---------------------------------|----------------------------------|
| JS1046 | <i>Δfnr1::Cm</i>                                                          | 1754380-<br>1755116             |                                  |
| JS1047 | <i>Δfnr1::Cm attλ::pDX1::hila'-lacZ</i>                                   |                                 |                                  |
| JS1048 | <i>Δfnr1::Cm ΔhilD138::Kn attλ::pDX1::hila'-lacZ</i>                      |                                 |                                  |
| JS1049 | <i>Δfnr1::Cm tetRA-rtSA attλ::pDX1::hila'-lacZ</i>                        |                                 |                                  |
| JS1050 | <i>Δfnr1::Cm ΔhilD138::Kn tetRA-rtSA attλ::pDX1::hila'-lacZ</i>           |                                 |                                  |
| JS1051 | $\Phi(hilD'-lac^+)$ 114 <i>Δfnr1::Cm</i>                                  |                                 |                                  |
| JS1052 | $\Phi(hilD'-lacZ)hyb139$ <i>Δfnr1::Cm</i>                                 |                                 |                                  |
| JS1053 | <i>ΔycfD612::Kn</i>                                                       | 1316880                         |                                  |
| JS1054 | <i>phoQ24 ΔycfD612::Kn</i>                                                |                                 |                                  |
| JS1055 | <i>phoQ24 ΔycfD612::Kn attλ::pDX1::hila'-lacZ</i>                         |                                 |                                  |
| JS1056 | <i>phoQ24 ΔycfD612::Kn ΔhilD114::Cm attλ::pDX1::hila'-lacZ</i>            |                                 |                                  |
| JS1057 | <i>phoQ24 ΔycfD612::Kn tetRA-rtSA attλ::pDX1::hila'-lacZ</i>              |                                 |                                  |
| JS1058 | <i>phoQ24 ΔycfD612::Kn ΔhilD114::Cm tetRA-rtSA attλ::pDX1::hila'-lacZ</i> |                                 |                                  |
| JS1059 | $\Phi(hilD'-lac^+)$ 114 <i>phoQ24 ΔycfD612</i>                            |                                 |                                  |
| JS1060 | $\Phi(hilD'-lacZ)hyb139$ <i>phoQ24 ΔycfD612</i>                           |                                 |                                  |
| JS577  | <i>ΔhilC113::Cm attλ::pDX1::hila'-lacZ</i>                                |                                 |                                  |
| JS579  | <i>ΔrtsA5 attλ::pDX1::hila'-lacZ</i>                                      |                                 |                                  |
| JS1061 | <i>phoQ24 ΔycfD612::Kn ΔhilC113::Cm attλ::pDX1::hila'-lacZ</i>            |                                 |                                  |
| JS1062 | <i>phoQ24 ΔycfD612::Kn ΔrtsA5 attλ::pDX1::hila'-lacZ</i>                  |                                 |                                  |
| JS1063 | <i>Δfnr2::Tet</i>                                                         | 1754321-<br>1755129             |                                  |
| JS1064 | <i>Δfnr2::Tet attλ::pDX1::hila'-lacZ</i>                                  |                                 |                                  |
| JS1065 | <i>Δfnr2::Tet ΔhilD114::Cm attλ::pDX1::hila'-lacZ</i>                     |                                 |                                  |
| JS1066 | <i>Δfnr2::Tet ΔhilC113::Cm attλ::pDX1::hila'-lacZ</i>                     |                                 |                                  |
| JS1067 | <i>Δfnr2::Tet ΔrtsA5 attλ::pDX1::hila'-lacZ</i>                           |                                 |                                  |
| JS1068 | <i>ΔphoPQ::Cm</i>                                                         | 1317242-<br>1319310             |                                  |
| JS1069 | <i>ΔphoPQ::Cm attλ::pDX1::hila'-lacZ</i>                                  |                                 |                                  |
| JS1070 | <i>Δfnr2::Tet ΔphoPQ::Cm attλ::pDX1::hila'-lacZ</i>                       |                                 |                                  |
| JS1071 | <i>Δhha1::Cm</i>                                                          | 528131-528349                   |                                  |
| JS1072 | <i>Δhha1::Cm attλ::pDX1::hila'-lacZ</i>                                   |                                 |                                  |
| JS1073 | <i>Δhha1::Cm ΔhilD138::Kn attλ::pDX1::hila'-lacZ</i>                      |                                 |                                  |
| JS1074 | <i>Δhha1::Cm tetRA-rtSA attλ::pDX1::hila'-lacZ</i>                        |                                 |                                  |
| JS1075 | <i>Δhha1::Cm ΔhilD138::Kn tetRA-rtSA attλ::pDX1::hila'-lacZ</i>           |                                 |                                  |
| JS1076 | $\Phi(hilD'-lac^+)$ 114 <i>Δhha1::Cm</i>                                  |                                 |                                  |
| JS1077 | $\Phi(hilD'-lacZ)hyb139$ <i>Δhha1::Cm</i>                                 |                                 |                                  |

| Name   | Genotype <sup>a</sup>                                                         | Deletion endpoints <sup>b</sup> | Source or reference <sup>c</sup> |
|--------|-------------------------------------------------------------------------------|---------------------------------|----------------------------------|
| JS1078 | <i>fis-3::Cm</i>                                                              |                                 | (72), listed as JG1160)          |
| JS1079 | <i>fis-3::Cm attλ::pDX1::hila'-lacZ</i>                                       |                                 |                                  |
| JS1080 | <i>fis-3::Cm Δhild138::Kn attλ::pDX1::hila'-lacZ</i>                          |                                 |                                  |
| JS1081 | <i>fis-3::Cm tetRA-rtsA attλ::pDX1::hila'-lacZ</i>                            |                                 |                                  |
| JS1082 | <i>fis-3::Cm Δhild138::Kn tetRA-rtsA attλ::pDX1::hila'-lacZ</i>               |                                 |                                  |
| JS1083 | Φ( <i>hild'-lac<sup>+</sup></i> )114 <i>fis-3::Cm</i>                         |                                 |                                  |
| JS1084 | Φ( <i>hild'-lacZ</i> ) <i>hyb139 fis-3::Cm</i>                                |                                 |                                  |
| JS1085 | <i>ΔhupA121::Cm</i>                                                           | 4386709-<br>4386981             |                                  |
| JS1086 | <i>ΔhupB122::Cm</i>                                                           | 508105-508378                   |                                  |
| JS1087 | <i>ΔhupA121:: ΔhupB122::Cm attλ::pDX1::hila'-lacZ</i>                         |                                 |                                  |
| JS1088 | <i>ΔhupA121:: ΔhupB122::Cm Δhild138::Kn attλ::pDX1::hila'-lacZ</i>            |                                 |                                  |
| JS1089 | <i>ΔhupA121:: ΔhupB122::Cm tetRA-rtsA attλ::pDX1::hila'-lacZ</i>              |                                 |                                  |
| JS1090 | <i>ΔhupA121:: ΔhupB122::Cm Δhild138::Kn tetRA-rtsA attλ::pDX1::hila'-lacZ</i> |                                 |                                  |
| JS1091 | Φ( <i>hild'-lac<sup>+</sup></i> )114 <i>ΔhupA121:: ΔhupB122::Cm</i>           |                                 |                                  |
| JS1092 | Φ( <i>hild'-lacZ</i> ) <i>hyb139 ΔhupA121:: ΔhupB122::Cm</i>                  |                                 |                                  |
| JS1093 | <i>ΔrfaH4531::Cm</i>                                                          | 4182923-<br>4183411             |                                  |
| JS1094 | <i>ΔrfaH4531::Cm attλ::pDX1::hila'-lacZ</i>                                   |                                 |                                  |
| JS1095 | <i>ΔrfaH4531::Cm Δhild138::Kn attλ::pDX1::hila'-lacZ</i>                      |                                 |                                  |
| JS1096 | <i>ΔrfaH4531::Cm tetRA-rtsA attλ::pDX1::hila'-lacZ</i>                        |                                 |                                  |
| JS1097 | <i>ΔrfaH4531::Cm Δhild138::Kn tetRA-rtsA attλ::pDX1::hila'-lacZ</i>           |                                 |                                  |
| JS1098 | Φ( <i>hild'-lac<sup>+</sup></i> )114 <i>ΔrfaH4531::Cm</i>                     |                                 |                                  |
| JS1099 | Φ( <i>hild'-lacZ</i> ) <i>hyb139 ΔrfaH4531::Cm</i>                            |                                 |                                  |
| JS1100 | <i>ΔrelA81::Kn</i>                                                            | 3102853-<br>3105080             |                                  |
| JS1101 | <i>ΔrelA81 ΔspoT292::Cm attλ::pDX1::hila'-lacZ</i>                            |                                 |                                  |
| JS1102 | <i>ΔrelA81 ΔspoT292::Cm Δhild138::Kn attλ::pDX1::hila'-lacZ</i>               |                                 |                                  |
| JS1103 | <i>ΔrelA81 ΔspoT292::Cm tetRA-rtsA attλ::pDX1::hila'-lacZ</i>                 |                                 |                                  |
| JS1104 | <i>ΔrelA81 ΔspoT292::Cm Δhild138::Kn tetRA-rtsA attλ::pDX1::hila'-lacZ</i>    |                                 |                                  |
| JS1105 | Φ( <i>hild'-lac<sup>+</sup></i> )114 <i>ΔrelA81 ΔspoT292::Cm</i>              |                                 |                                  |
| JS1106 | Φ( <i>hild'-lacZ</i> ) <i>hyb139 ΔrelA81 ΔspoT292::Cm</i>                     |                                 |                                  |
| JS1107 | <i>Δfur41::Cm attλ::pDX1::hila'-lacZ</i>                                      |                                 |                                  |
| JS1108 | <i>Δfur41::Cm Δhild138::Kn attλ::pDX1::hila'-lacZ</i>                         |                                 |                                  |
| JS1109 | <i>Δfur41::Cm tetRA-rtsA attλ::pDX1::hila'-lacZ</i>                           |                                 |                                  |

| Name   | Genotype <sup>a</sup>                                                     | Deletion endpoints <sup>b</sup> | Source or reference <sup>c</sup> |
|--------|---------------------------------------------------------------------------|---------------------------------|----------------------------------|
| JS1110 | <i>Δfur41::Cm ΔhilD138::Kn tetRA-rtsA attλ::pDX1::hila'-lacZ</i>          |                                 |                                  |
| JS1111 | <i>Φ(hilD'-lac<sup>+</sup>)114 Δfur41::Cm</i>                             |                                 |                                  |
| JS1112 | <i>Φ(hilD'-lacZ)hyb139 Δfur41::Cm</i>                                     |                                 |                                  |
| JS1113 | <i>attλ::pDX1::hila'-lacZ hilD138</i>                                     |                                 |                                  |
| JS1114 | <i>attλ::pDX1::hila'-lacZ ΔfliZ8042</i>                                   |                                 |                                  |
| JS1115 | <i>attλ::pDX1::hila'-lacZ ΔflhDC8045 tetRA-fliZ</i>                       |                                 |                                  |
| JS1116 | <i>attλ::pDX1::hila'-lacZ hilD138 Δhile115::Cm</i>                        |                                 |                                  |
| JS1117 | <i>attλ::pDX1::hila'-lacZ ΔfliZ8042 Δhile115::Cm</i>                      |                                 |                                  |
| JS1118 | <i>attλ::pDX1::hila'-lacZ ΔflhDC8045 tetRA-fliZ Δhile115::Cm</i>          |                                 |                                  |
| JS1119 | <i>attλ::pDX1::hila'-lacZ hilD138 ΔenvZ182::Cm</i>                        |                                 |                                  |
| JS1120 | <i>attλ::pDX1::hila'-lacZ ΔfliZ8042 ΔenvZ182::Cm</i>                      |                                 |                                  |
| JS1121 | <i>attλ::pDX1::hila'-lacZ ΔflhDC8045 tetRA-fliZ ΔenvZ182::Cm</i>          |                                 |                                  |
| JS1122 | <i>attλ::pDX1::hila'-lacZ hilD138 ΔfadD21::Kn</i>                         |                                 |                                  |
| JS1123 | <i>attλ::pDX1::hila'-lacZ ΔfliZ8042 ΔfadD21::Kn</i>                       |                                 |                                  |
| JS1124 | <i>attλ::pDX1::hila'-lacZ ΔflhDC8045 tetRA-fliZ ΔfadD21::Kn</i>           |                                 |                                  |
| JS1125 | <i>attλ::pDX1::hila'-lacZ hilD138 sirA3::Cm</i>                           |                                 |                                  |
| JS1126 | <i>attλ::pDX1::hila'-lacZ ΔfliZ8042 sirA3::Cm</i>                         |                                 |                                  |
| JS1127 | <i>attλ::pDX1::hila'-lacZ ΔflhDC8045 tetRA-fliZ sirA3::Cm</i>             |                                 |                                  |
| JS1128 | <i>attλ::pDX1::hila'-lacZ hilD138 Δdam241::Cm</i>                         |                                 |                                  |
| JS1129 | <i>attλ::pDX1::hila'-lacZ ΔfliZ8042 Δdam241::Cm</i>                       |                                 |                                  |
| JS1130 | <i>attλ::pDX1::hila'-lacZ ΔflhDC8045 tetRA-fliZ Δdam241::Cm</i>           |                                 |                                  |
| JS1131 | <i>attλ::pDX1::hila'-lacZ hilD138 Δ(ack-pta)4202::Cm</i>                  |                                 |                                  |
| JS1132 | <i>attλ::pDX1::hila'-lacZ ΔfliZ8042 Δ(ack-pta)4202::Cm</i>                |                                 |                                  |
| JS1133 | <i>attλ::pDX1::hila'-lacZ ΔflhDC8045 tetRA-fliZ Δ(ack-pta)4202::Cm</i>    |                                 |                                  |
| JS1134 | <i>attλ::pDX1::hila'-lacZ hilD138 ΔyfgL611::Cm</i>                        |                                 |                                  |
| JS1135 | <i>attλ::pDX1::hila'-lacZ ΔfliZ8042 ΔyfgL611::Cm</i>                      |                                 |                                  |
| JS1136 | <i>attλ::pDX1::hila'-lacZ ΔflhDC8045 tetRA-fliZ ΔyfgL611::Cm</i>          |                                 |                                  |
| JS1137 | <i>attλ::pDX1::hila'-lacZ hilD138 Δhha1::Cm</i>                           |                                 |                                  |
| JS1138 | <i>attλ::pDX1::hila'-lacZ ΔfliZ8042 Δhha1::Cm</i>                         |                                 |                                  |
| JS1139 | <i>attλ::pDX1::hila'-lacZ ΔflhDC8045 tetRA-fliZ Δhha1::Cm</i>             |                                 |                                  |
| JS1140 | <i>attλ::pDX1::hila'-lacZ hilD138 fis-3::Cm</i>                           |                                 |                                  |
| JS1141 | <i>attλ::pDX1::hila'-lacZ ΔfliZ8042 Δfis::Cm</i>                          |                                 |                                  |
| JS1142 | <i>attλ::pDX1::hila'-lacZ ΔflhDC8045 tetRA-fliZ fis-3::Cm</i>             |                                 |                                  |
| JS1143 | <i>attλ::pDX1::hila'-lacZ hilD138 ΔhupA121 ΔhupB122::Cm</i>               |                                 |                                  |
| JS1144 | <i>attλ::pDX1::hila'-lacZ ΔfliZ8042 ΔhupA121 ΔhupB122::Cm</i>             |                                 |                                  |
| JS1145 | <i>attλ::pDX1::hila'-lacZ ΔflhDC8045 tetRA-fliZ ΔhupA121 ΔhupB122::Cm</i> |                                 |                                  |
| JS1146 | <i>attλ::pDX1::hila'-lacZ hilD138 Δrfah4531::Cm</i>                       |                                 |                                  |

| Name            | Genotype <sup>a</sup>                                                        | Deletion endpoints <sup>b</sup> | Source or reference <sup>c</sup> |
|-----------------|------------------------------------------------------------------------------|---------------------------------|----------------------------------|
| JS1147          | <i>attλ::pDX1::hilA'-lacZ ΔfliZ8042 ΔrfaH4531::Cm</i>                        |                                 |                                  |
| JS1148          | <i>attλ::pDX1::hilA'-lacZ ΔflhDC8045 tetRA-fliZ ΔrfaH4531::Cm</i>            |                                 |                                  |
| JS1149          | <i>attλ::pDX1::hilA'-lacZ hild138 ΔrelA81::Kn ΔspoT292::Cm</i>               |                                 |                                  |
| JS1150          | <i>attλ::pDX1::hilA'-lacZ ΔfliZ8042 ΔrelA81::Kn ΔspoT292::Cm</i>             |                                 |                                  |
| JS1151          | <i>attλ::pDX1::hilA'-lacZ ΔflhDC8045 tetRA-fliZ ΔrelA81::Kn ΔspoT292::Cm</i> |                                 |                                  |
| JS1152          | <i>attλ::pDX1::hilA'-lacZ hild138 Δfur41::Cm</i>                             |                                 |                                  |
| JS1153          | <i>attλ::pDX1::hilA'-lacZ ΔfliZ8042 Δfur41::Cm</i>                           |                                 |                                  |
| JS1154          | <i>attλ::pDX1::hilA'-lacZ ΔflhDC8045 tetRA-fliZ Δfur41::Cm</i>               |                                 |                                  |
| JS1155          | <i>ΔflhDC8045::Cm</i>                                                        | 2022064-<br>2021175             |                                  |
| JS1156          | <i>attλ::pDX1::hilA'-lacZ ΔflhDC8045::Cm</i>                                 |                                 |                                  |
| JS1157          | <i>attλ::pDX1::hilA'-lacZ hild138 ΔflhDC8045::Cm</i>                         |                                 |                                  |
| JS1158          | <i>attλ::pDX1::hilA'-lacZ ΔfliZ8042 ΔflhDC8045::Cm</i>                       |                                 |                                  |
| JS1159          | <i>ΔtdcA51::Cm</i>                                                           | 3412473-<br>3413411             |                                  |
| JS1160          | <i>attλ::pDX1::hilA'-lacZ ΔtdcA51::Cm</i>                                    |                                 |                                  |
| JS1161          | <i>attλ::pDX1::hilA'-lacZ hild138 ΔtdcA51::Cm</i>                            |                                 |                                  |
| JS1162          | <i>attλ::pDX1::hilA'-lacZ ΔfliZ8042 ΔtdcA51::Cm</i>                          |                                 |                                  |
| JS1163          | <i>attλ::pDX1::hilA'-lacZ ΔflhDC8045 tetRA-fliZ ΔtdcA51::Cm</i>              |                                 |                                  |
| <b>Plasmids</b> | <b>Relevant Characteristics</b>                                              | <b>Cloned End Points</b>        |                                  |
| pKD46           | <i>bla</i> P <sub>BAD</sub> <i>gam bet exo</i> pSC101 oriTS                  |                                 | (24)                             |
| pCP20           | <i>bla cat cI857 λP<sub>R</sub> flp</i> pSC101 oriTS                         |                                 | (18)                             |
| pKD3            | <i>bla</i> FRT <i>cat</i> FRT PS1 PS2 oriR6K                                 |                                 | (24)                             |
| pKD4            | <i>bla</i> FRT <i>aph</i> FRT PS1 PS2 oriR6K                                 |                                 | (24)                             |
| pWKS30          | pSC101 ori, Ap <sup>f</sup>                                                  |                                 | (106)                            |
| pRfaH           |                                                                              | 4182924-                        |                                  |
| (pKG115)        | pWKS30:: <i>rfaH</i> <sup>+</sup>                                            | 4183440                         |                                  |

<sup>a</sup> All strains are isogenic derivatives of ATCC 14028.

<sup>b</sup> The numbers indicate the base pairs that are deleted (strains) or cloned (plasmids) (inclusive) as defined in the *S. enterica* serovar Typhimurium LT2 genome sequence in the National Center for Biotechnology Information database.

<sup>c</sup> This study unless specified otherwise.

<sup>d</sup> ATCC, American Type Culture Collection.
