# Supplementary material
Source: PubMed Central journal article supplement (PMC3249375)
Supplement: supp_111.132779_TableS3.pdf [file supp_111.132779_TableS3.pdf]

**TABLE S3** Transcriptomic datasets that reveal co-regulation of SPI 1 and flagellar genes in *Salmonella Typhimurium*

| Global response to a regulatory system or specific environmental stimuli | Reference  | Regulates <i>hilA</i> through <i>FliZ</i> ? <sup>a</sup> | Class of SPI1 regulator |
|--------------------------------------------------------------------------|------------|----------------------------------------------------------|-------------------------|
| Macrophage                                                               | (33)       | ND                                                       |                         |
| CsrA <sup>b</sup>                                                        | (51)       | no                                                       | II                      |
| Antimicrobial peptides                                                   | (5)        | ND                                                       |                         |
| Bile                                                                     | (81)       | no                                                       |                         |
| Swarming                                                                 | (104; 105) | ND                                                       |                         |
| Fis                                                                      | (48)       | no                                                       | IV                      |
| RfaH                                                                     | (67)       | no                                                       | IV                      |
| YfgL                                                                     | (37)       | no                                                       | II                      |
| Fnr                                                                      | (39)       | no                                                       | III                     |
| Hydrogen peroxide                                                        | (40)       | ND                                                       |                         |

<sup>a</sup> No indicates that the factor regulates *hilA* in a *fliZ* null background and when *FliZ* is ectopically expressed. ND - Not Determined

<sup>b</sup> Effect of the loss of *SirA* was tested
