# Supplementary material
Source: PubMed Central journal article supplement (PMC3249375)

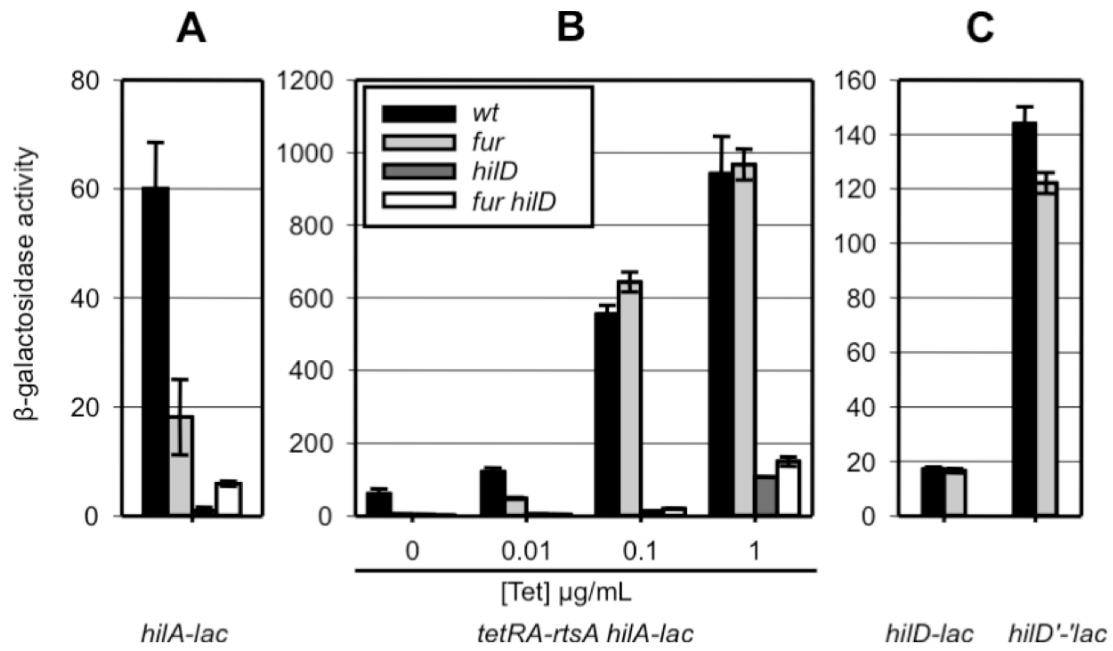

**Figure S16** Class V, Fur activates *hilA* expression via HilD. See FIGURE S2 legend for details.

Supplement: supp_111.132779_FigureS16.pdf [file supp_111.132779_FigureS16.pdf]
